# Supplementary material
Source: PubMed Central journal article supplement (PMC4737863)
Supplement: supp_JCO.2015.61.5997_DS_2015.615997.pdf [file supp_JCO.2015.61.5997_DS_2015.615997.pdf]

**Impact of Precision Medicine in Diverse Cancers: a Meta-Analysis of 32,149 Patients in  
Phase II Clinical Trials**

**Schwaederle, et al**

## **SUPPLEMENTAL MATERIAL**

### **Supplemental Methods**

**Supplemental Table 1. Sub-analysis of personalized arms for the response rate (RR), progression-free survival (PFS), and overall survival (OS) –univariable analysis–**

**Supplemental Table 2. Sub-analysis of the type of biomarker used for personalized arms (univariable analysis)**

**Supplemental Table 3. Sub-analysis of the outcome parameters in targeted and cytotoxic arms.**

**Supplemental Figure 1. Flow diagram of studies inclusion/exclusion**

**Supplemental Reference List (N=570 studies included)**

## Supplemental Methods

### Details of study selection and Data Extraction:

We considered response rate (RR), progression free survival (PFS) or time to progression (TTP) when PFS was not available, and overall survival (OS) as acceptable efficacy endpoints.

The following information were extracted from manuscripts: five-years impact factor, underlying malignancy, line of therapy, class of agent, route of administration, presence and type of biomarker used for patient selection, number of enrolled patients, description of arms (if applicable), drug dose/schedule, response criteria adopted, median PFS and 95%CI (or TTP when PFS not available), median OS and 95%CI, and RR (%), number of responders, and treatment related deaths.

Responses were recorded according to the response criteria utilized in the trial: for solid tumors, partial and complete responses as per Response Evaluation in Solid Tumors Criteria (RECIST) or World Health Organization Criteria (WHO); for chronic myelogenous leukemia (CML), complete cytogenetic responses; for multiple myeloma (MM), partial and complete responses; for acute myelogenous leukemia (AML), complete responses; and for lymphomas, partial and complete responses by WHO criteria.

### Personalized therapy definition:

For the purpose of our analysis we defined personalized therapy when a treatment met one of the following criteria: i. Cognate biomarker used for treatment indication OR ii. No cognate biomarker used, but at least 50% of patients are known to harbor the cognate biomarker (e.g. patients with gastro-intestinal stromal tumors (GIST; drug targeting KIT); chronic myeloid leukemia (CML; drug targeting BCR-Abl); or chronic lymphocytic leukemia (CLL; drug targeting CD-20)).

A drug was considered personalized if the half maximal inhibitory concentration ( $IC_{50}$ ) impacted the target at low nM range (<100 nM) (for small molecule inhibitors) or if the target was the primary one recognized by an antibody. (Targeted arms that did not select patients according to our definition of a personalized strategy (see above) were considered non-personalized.) More specifically, we defined “personalized–direct” as a drug that directly impacts the product of the molecular alteration or a protein preferentially expressed on the tumor cells, or its first immediate downstream effectors. Examples would include a PIK3CA inhibitor in a patient with either a *PIK3CA* mutation (direct effect on the molecular aberration) or *PTEN* loss (effect on first downstream effectors’ since *PTEN* loss results in PIK3CA activation).

“Personalized–indirect” was the term used for a drug that affects a target at least two effectors removed from the molecular aberration. Examples would include an mTOR inhibitor in a patient with a *PIK3CA* mutation (since PIK3CA signals through AKT to mTOR) or in a patient with *PTEN* loss (which activates PIK3CA, which then in turn activates AKT and mTOR). We also included in “personalized indirect” small molecule inhibitors that had an  $IC_{50}$  over 100nM; but no more than 250nM, even if the target affected was the direct cognate or only one step removed.

The complexity of signal cascades suggests that many signals intersect at some point. Molecular aberrations are likely to activate several interacting pathways and, hence, a drug impacting an effector far removed from the aberration would be less likely to mitigate the effect of the aberration and was considered “not personalized”. Complicating this classification is the possibility that pathways have multiple intermediaries that might be differentially activated depending on tumor histology. Therefore, therapies that targeted pathways further removed from the aberration were not considered personalized.

### Definition of cytotoxic versus targeted agent:

Cytotoxic chemotherapy uses chemical substances to kill cells that divide rapidly (a key feature of cancer cells). That means that cytotoxics also harm normal, rapidly dividing cells, such as those in the bone marrow, gastrointestinal tract and hair follicles, often resulting in myelosuppression, mucositis and alopecia. Targeted agents are frequently cytostatic and are designed to specifically impact signals in the cancer cell that are abnormal or are differentially expressed compared to those on normal elements. In our analysis, immunotherapies were classified as targeted.

**Supplemental Table 1. Sub-analysis of personalized arms for the response rate (RR), progression-free survival (PFS), and overall survival (OS) –univariable analysis–**

|                                                  |                                        | Pooled analysis  |                  |                      | Meta-analysis    |                  |                      |
|--------------------------------------------------|----------------------------------------|------------------|------------------|----------------------|------------------|------------------|----------------------|
|                                                  |                                        | N                | Median (CI 95%)  | P-value <sup>a</sup> | N                | Median (CI 95%)  | P-value <sup>b</sup> |
| RESPONSE RATE (RR) (%)                           | Total arms with valid values for RR    | <b>638</b>       | 8 (6.8-8.9)      |                      | <b>638</b>       | 12.7 (11.6-13.9) |                      |
|                                                  | <b>Personalized TOTAL</b>              |                  |                  | <b>&lt;0.0001</b>    |                  |                  | <b>&lt;0.0001</b>    |
|                                                  | Yes                                    | 112              | 29.2 (24-35)     |                      | 112              | 31 (26.8-35.6)   |                      |
|                                                  | Not personalized                       | 526              | 6.2 (5-7.4)      |                      | 526              | 10.5 (9.6-1.5)   |                      |
|                                                  | <b>Personalized DIRECT<sup>c</sup></b> |                  |                  | <b>&lt;0.0001</b>    |                  |                  | <b>&lt;0.0001</b>    |
|                                                  | Yes                                    | 82               | 27.7 (23.7-36.0) |                      | 82               | 32.3 (27.1-38.1) |                      |
|                                                  | Not personalized                       | 526              | 6.2 (5-7.4)      |                      | 526              | 10.5 (9.6-1.5)   |                      |
|                                                  | <b>Personalized INDIRECT</b>           |                  |                  | <b>&lt;0.0001</b>    |                  |                  | <b>&lt;0.0001</b>    |
| Yes                                              | 30                                     | 30.5 (15.8-35.3) |                  | 30                   | 29.5 (24.2-35.4) |                  |                      |
| Not personalized                                 | 526                                    | 6.2 (5-7.4)      |                  | 526                  | 10.5 (9.6-1.5)   |                  |                      |
| PROGRESSION-FREE SURVIVAL (PFS) (Median, Months) | Total arms with valid values for PFS   | <b>530</b>       | 3 (2.8-3.2)      |                      | <b>342</b>       | 3 (2.9-3.1)      |                      |
|                                                  | <b>Personalized TOTAL</b>              |                  |                  | <b>&lt;0.0001</b>    |                  |                  | <b>&lt;0.0001</b>    |
|                                                  | Yes                                    | 86               | 6.8 (5.3-7.6)    |                      | 59               | 5.9 (5.4-6.3)    |                      |
|                                                  | Not personalized                       | 444              | 2.8 (2.7-3.0)    |                      | 283              | 2.7 (2.6-2.9)    |                      |
|                                                  | <b>Personalized DIRECT<sup>c</sup></b> |                  |                  | <b>&lt;0.0001</b>    |                  |                  | <b>&lt;0.0001</b>    |
|                                                  | Yes                                    | 59               | 5.6 (4-7.7)      |                      | 39               | 5.8 (5.2-6.4)    |                      |
|                                                  | Not personalized                       | 444              | 2.8 (2.7-3.0)    |                      | 283              | 2.7 (2.6-2.9)    |                      |
|                                                  | <b>Personalized INDIRECT</b>           |                  |                  | <b>&lt;0.0001</b>    |                  |                  | <b>&lt;0.0001</b>    |
| Yes                                              | 27                                     | 7.4 (6.4-8.4)    |                  | 20                   | 6.4 (5.3-7.5)    |                  |                      |
| Not personalized                                 | 444                                    | 2.8 (2.7-3.0)    |                  | 283                  | 2.7 (2.6-2.9)    |                  |                      |
| OVERALL SURVIVAL (OS) (Median, Months)           | Total arms with valid values for OS    | <b>441</b>       | 9.4 (8.8-10.0)   |                      | <b>247</b>       | 9.1 (8.6-9.6)    |                      |
|                                                  | <b>Personalized TOTAL</b>              |                  |                  | <b>&lt;0.0001</b>    |                  |                  | <b>0.0003</b>        |
|                                                  | Yes                                    | 49               | 15.9 (11.4-18.3) |                      | 21               | 13.7 (11.1-16.4) |                      |
|                                                  | Not personalized                       | 392              | 9 (8.3-9.7)      |                      | 226              | 8.9 (8.3-9.3)    |                      |
|                                                  | <b>Personalized DIRECT<sup>c</sup></b> |                  |                  | <b>0.001</b>         |                  |                  | <b>&lt;0.0001</b>    |
|                                                  | Yes                                    | 38               | 15.4 (11-18)     |                      | 17               | 12.6 (9.9-15.3)  |                      |
|                                                  | Not personalized                       | 392              | 9 (8.3-9.7)      |                      | 226              | 8.9 (8.3-9.3)    |                      |
|                                                  | <b>Personalized INDIRECT</b>           |                  |                  | <b>0.001</b>         |                  |                  | <b>&lt;0.0001</b>    |
| Yes                                              | 11                                     | 23.1 (10.3-32.5) |                  | 4                    | 19.2 (13.3-25)   |                  |                      |
| Not personalized                                 | 392                                    | 9 (8.3-9.7)      |                  | 226                  | 8.9 (8.3-9.3)    |                  |                      |

<sup>a</sup>Wilcoxon test ; <sup>b</sup>Mixed effect analysis. <sup>c</sup>“personalized direct” was defined as a drug that directly impacts the product of the molecular alteration or a protein preferentially expressed on the tumor cells, or its first immediate downstream effectors. If “personalized direct” was defined as as a drug that strictly impacts directly the product of the molecular alteration or a protein preferentially expressed on the tumor cells (not its first immediate downstream effector), results were also statistically significant for all the analysis, except the overall survival analysis in the meta-analysis, though numbers were very low (data not shown). CI means confidence interval.

**Supplemental Table 2. Sub-analysis of the type of biomarker used for personalized arms (univariable analysis)**

|              |                                     | Pooled analysis |                                  |                             | Meta-analysis |                                  |                             |
|--------------|-------------------------------------|-----------------|----------------------------------|-----------------------------|---------------|----------------------------------|-----------------------------|
|              |                                     | <i>N</i>        | <i>Median</i><br><i>(CI 95%)</i> | <i>P-value</i> <sup>a</sup> | <i>N</i>      | <i>Median</i><br><i>(CI 95%)</i> | <i>P-value</i> <sup>b</sup> |
| RR (%)       | <b>Total arms with RR reported</b>  | <b>112</b>      | 29.2 (24-35)                     |                             | <b>112</b>    | 31 (26.8-35.6)                   |                             |
|              | <b>Type of biomarker used</b>       |                 |                                  | <b>0.005</b>                |               |                                  | <b>0.027</b>                |
|              | Protein                             | 34              | 18.7 (6.4-28.5)                  |                             | 34            | 24.2 (18.5-31.0)                 |                             |
|              | Genomic                             | 78              | 33.3 (26.3-41.0)                 |                             | 78            | 34.1 (28.6-40.1)                 |                             |
| PFS (Months) | <b>Total arms with PFS reported</b> | <b>86</b>       | 6.8 (5.3-7.6)                    |                             | <b>59</b>     | 5.9 (5.4-6.3)                    |                             |
|              | <b>Type of biomarker used</b>       |                 |                                  | <b>0.005</b>                |               |                                  | <b>0.015</b>                |
|              | Protein                             | 24              | 3.7 (1.8-6.4)                    |                             | 15            | 5.0 (4.3-5.8)                    |                             |
|              | Genomic                             | 62              | 7.5 (6.4-9.0)                    |                             | 44            | 6.4 (5.6-7.1)                    |                             |
| OS (Months)  | <b>Total arms with OS reported</b>  | <b>49</b>       | 15.9 (11.4-18.3)                 |                             | <b>21</b>     | 13.7 (11.1-16.4)                 |                             |
|              | <b>Type of biomarker used</b>       |                 |                                  | <b>&lt;0.0001</b>           |               |                                  | <b>0.007</b>                |
|              | Protein                             | 15              | 6.0 (5.3-11.0)                   |                             | 5             | 8.2 (3.6-12.8)                   |                             |
|              | Genomic                             | 34              | 18.6 (15.9-24.3)                 |                             | 16            | 16.0 (12.7-19.2)                 |                             |

<sup>a</sup>Wilcoxon test ; <sup>b</sup>Mixed effect analysis. A “protein biomarker” was defined as the presence of a protein overexpression (included Bcl-2, CD20, CD33, CD4, CD52, c-Kit, ERCC, PDGFR, EGFR, EpCAM, HER2, NOTCH, PSCA, and RANKL); “genomic biomarker” was defined as the presence of a genetic alteration (included BCR-ABL, BRAF, BRCA1/2, EGFR, ERBB2, FLT3, JAK2, KIT, KRAS, PDGFB, PTEN, RET, TSC1/2, or VHL alterations). Abbreviations: RR: Response rate; PFS: Progression-free survival; OS: Overall survival; CI: confidence interval.

**Supplemental Table 3. Sub-analysis of the outcome parameters in targeted and cytotoxic arms.**

|                                                     |                                                      | Pooled analysis |                        |                            | Meta-analysis  |                        |                            |
|-----------------------------------------------------|------------------------------------------------------|-----------------|------------------------|----------------------------|----------------|------------------------|----------------------------|
|                                                     |                                                      | <i>N</i>        | <i>Median (CI 95%)</i> | <i>P-value<sup>a</sup></i> | <i>N</i>       | <i>Median (CI 95%)</i> | <i>P-value<sup>b</sup></i> |
| RR (%)                                              | <b>Total arms with RR reported for sub-analysis</b>  | <b>426</b>      |                        |                            | <b>426</b>     |                        |                            |
|                                                     | Targeted personalized                                | 111             | 30 (24-34.8)           | <0.0001                    | 111            | 31.3 (27-36)           | <0.0001                    |
|                                                     | Targeted non-personalized                            | 315             | 4 (3-5)                |                            | 315            | 7.5 (6.6-8.5)          |                            |
|                                                     | <b>Total arms with RR reported for sub-analysis</b>  | <b>323</b>      |                        |                            | <b>323</b>     |                        |                            |
|                                                     | Targeted personalized                                | 111             | 30 (24-34.8)           | <0.0001                    | 111            | 31.3 (27-36)           | <0.0001                    |
|                                                     | Cytotoxic                                            | 212             | 11.9 (9.3-14.5)        |                            | 212            | 16.1 (14.3-18)         |                            |
|                                                     | <b>Total arms with RR reported for sub-analysis</b>  | <b>527</b>      |                        |                            | <b>527</b>     |                        |                            |
|                                                     | Targeted non-personalized                            | 315             | 4 (3-5)                | <0.0001                    | 315            | 7.5 (6.6-8.5)          | <0.0001                    |
| PFS (Months)                                        | Cytotoxic                                            | 212             | 11.9 (9.3-14.5)        |                            | 212            | 16.1 (14.3-18)         |                            |
|                                                     | <b>Total arms with PFS reported for sub-analysis</b> | <b>355</b>      |                        |                            | <b>233</b>     |                        |                            |
|                                                     | Targeted personalized                                | 85              | 6.9 (5.3-7.7)          | <0.0001                    | 58             | 6.1 (5.6-6.6)          | <0.0001                    |
|                                                     | Targeted non-personalized                            | 270             | 2.6 (2.3-2.8)          |                            | 175            | 2.5 (2.4-2.6)          |                            |
|                                                     | <b>Total arms with PFS reported for sub-analysis</b> | <b>260</b>      |                        |                            | <b>167</b>     |                        |                            |
|                                                     | Targeted personalized                                | 85              | 6.9 (5.3-7.7)          | <0.0001                    | 58             | 6.1 (5.6-6.6)          | <0.0001                    |
|                                                     | Cytotoxic                                            | 175             | 3.3 (3.0-3.7)          |                            | 109            | 3.3 (3.0-3.5)          |                            |
|                                                     | <b>Total arms with PFS reported for sub-analysis</b> | <b>445</b>      |                        |                            | <b>284</b>     |                        |                            |
| OS (Months)                                         | Targeted non-personalized                            | 270             | 2.6 (2.3-2.8)          | <0.0001                    | 175            | 2.5 (2.4-2.6)          | <0.0001                    |
|                                                     | Cytotoxic                                            | 175             | 3.3 (3.0-3.7)          |                            | 109            | 3.3 (3.0-3.5)          |                            |
|                                                     | <b>Total arms with OS reported for sub-analysis</b>  | <b>274</b>      |                        |                            | <b>148</b>     |                        |                            |
|                                                     | Targeted personalized                                | 48              | 15.9 (13.5-18.3)       | <0.0001                    | 21             | 13.7 (11-16.4)         | <0.0001                    |
|                                                     | Targeted non-personalized                            | 226             | 8.7 (7.9-9.5)          |                            | 127            | 8.3 (7.7-8.9)          |                            |
|                                                     | <b>Total arms with OS reported for sub-analysis</b>  | <b>215</b>      |                        |                            | <b>120</b>     |                        |                            |
|                                                     | Targeted personalized                                | 48              | 15.9 (13.5-18.3)       | <0.0001                    | 21             | 13.7 (11-16.4)         | 0.002                      |
|                                                     | Cytotoxic                                            | 167             | 9.4 (8.5-10.4)         |                            | 99             | 9.3 (8.5-10.1)         |                            |
| <b>Total arms with OS reported for sub-analysis</b> | <b>393</b>                                           |                 |                        | <b>226</b>                 |                |                        |                            |
| Targeted non-personalized                           | 226                                                  | 8.7 (7.9-9.5)   | 0.054                  | 127                        | 8.3 (7.7-8.9)  | 0.048                  |                            |
| Cytotoxic                                           | 167                                                  | 9.4 (8.5-10.4)  |                        | 99                         | 9.3 (8.5-10.1) |                        |                            |

<sup>a</sup>Wilcoxon test ; <sup>b</sup>Mixed effect analysis. Abbreviations: RR: Response rate; PFS: Progression-free survival; OS: Overall survival; CI: confidence interval. Only one arm was personalized in the “cytotoxic”.

## Supplemental Figure 1. Flow diagram of studies inclusion/exclusion

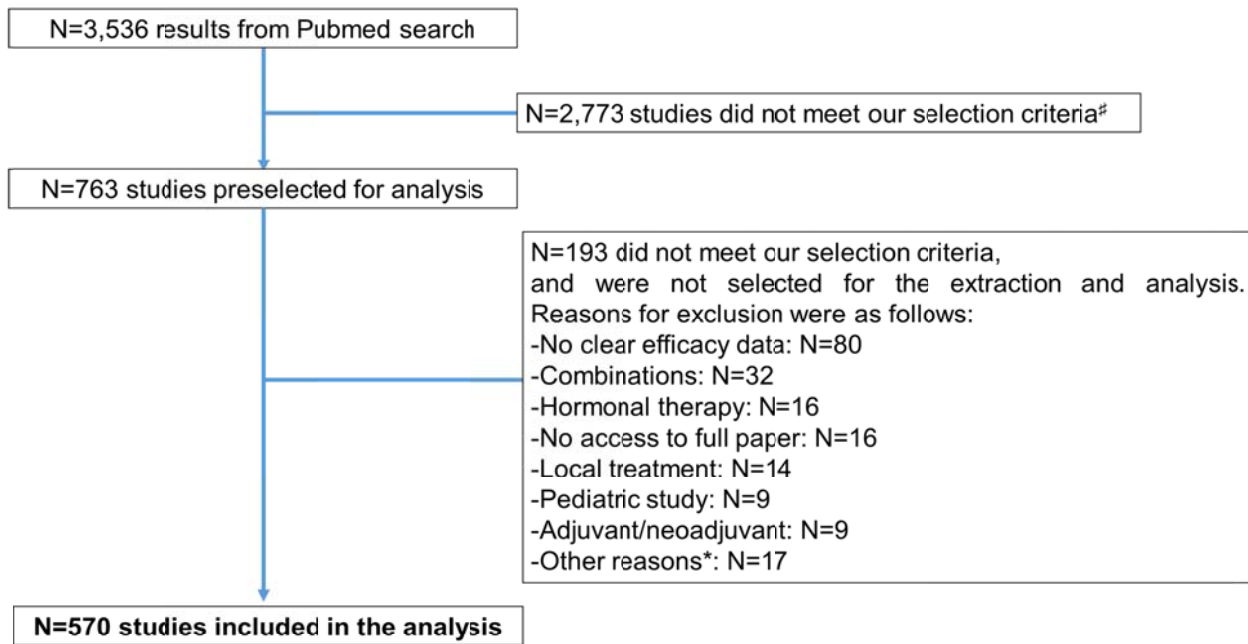

<sup>#</sup>Reading of the study title clearly mentioned an exclusion criteria; main reasons were combinations, hormonal therapy, pediatric study or local treatment were tested.

\*Other reasons for exclusion: cell and vaccine therapy, n=9; update on study initially published outside of the selection timeframe, n=3; Not a phase II study, n=3; Regimen comprised radiotherapy, n=2.

## Supplemental Reference List (N=570 studies included)

1. Tomita Y, Uemura H, Fujimoto H, et al. Key predictive factors of axitinib (AG-013736)-induced proteinuria and efficacy: a phase II study in Japanese patients with cytokine-refractory metastatic renal cell Carcinoma. *Eur J Cancer Oxf Engl 1990*. 2011;47(17):2592-2602. doi:10.1016/j.ejca.2011.07.014.
2. Rambaldi A, Dellacasa CM, Finazzi G, et al. A pilot study of the Histone-Deacetylase inhibitor Givinostat in patients with JAK2V617F positive chronic myeloproliferative neoplasms. *Br J Haematol*. 2010;150(4):446-455. doi:10.1111/j.1365-2141.2010.08266.x.
3. Paul C, Sans B, Suarez F, et al. Masitinib for the treatment of systemic and cutaneous mastocytosis with handicap: a phase 2a study. *Am J Hematol*. 2010;85(12):921-925. doi:10.1002/ajh.21894.
4. Le Cesne A, Blay J-Y, Bui BN, et al. Phase II study of oral masitinib mesilate in imatinib-naïve patients with locally advanced or metastatic gastro-intestinal stromal tumour (GIST). *Eur J Cancer Oxf Engl 1990*. 2010;46(8):1344-1351. doi:10.1016/j.ejca.2010.02.014.
5. Cauchi C, Somaiah N, Engstrom PF, et al. Evaluation of nilotinib in advanced GIST previously treated with imatinib and sunitinib. *Cancer Chemother Pharmacol*. 2012;69(4):977-982. doi:10.1007/s00280-011-1785-7.
6. Sawaki A, Nishida T, Doi T, et al. Phase 2 study of nilotinib as third-line therapy for patients with gastrointestinal stromal tumor. *Cancer*. 2011;117(20):4633-4641. doi:10.1002/cncr.26120.
7. Cho JH, Kim KM, Kwon M, Kim JH, Lee J. Nilotinib in patients with metastatic melanoma harboring KIT gene aberration. *Invest New Drugs*. 2012;30(5):2008-2014. doi:10.1007/s10637-011-9763-9.
8. Kaye SB, Lubinski J, Matulonis U, et al. Phase II, open-label, randomized, multicenter study comparing the efficacy and safety of olaparib, a poly (ADP-ribose) polymerase inhibitor, and pegylated liposomal doxorubicin in patients with BRCA1 or BRCA2 mutations and recurrent ovarian cancer. *J Clin Oncol Off J Am Soc Clin Oncol*. 2012;30(4):372-379. doi:10.1200/JCO.2011.36.9215.
9. Gelmon KA, Tischkowitz M, Mackay H, et al. Olaparib in patients with recurrent high-grade serous or poorly differentiated ovarian carcinoma or triple-negative breast cancer: a phase 2, multicentre, open-label, non-randomised study. *Lancet Oncol*. 2011;12(9):852-861. doi:10.1016/S1470-2045(11)70214-5.
10. Tutt A, Robson M, Garber JE, et al. Oral poly(ADP-ribose) polymerase inhibitor olaparib in patients with BRCA1 or BRCA2 mutations and advanced breast cancer: a proof-of-concept trial. *Lancet*. 2010;376(9737):235-244. doi:10.1016/S0140-6736(10)60892-6.
11. Eisen T, Joensuu H, Nathan PD, et al. Regorafenib for patients with previously untreated metastatic or unresectable renal-cell carcinoma: a single-group phase 2 trial. *Lancet Oncol*. 2012;13(10):1055-1062. doi:10.1016/S1470-2045(12)70364-9.
12. Mancuso A, Di Paola ED, Leone A, et al. Phase II escalation study of sorafenib in patients with metastatic renal cell carcinoma who have been previously treated with anti-angiogenic treatment. *BJU Int*. 2012;109(2):200-206. doi:10.1111/j.1464-410X.2011.10421.x.



13. Procopio G, Verzoni E, Bracarda S, et al. Sorafenib with interleukin-2 vs sorafenib alone in metastatic renal cell carcinoma: the ROSORC trial. *Br J Cancer*. 2011;104(8):1256-1261. doi:10.1038/bjc.2011.103.
14. Garcia JA, Hutson TE, Elson P, et al. Sorafenib in patients with metastatic renal cell carcinoma refractory to either sunitinib or bevacizumab. *Cancer*. 2010;116(23):5383-5390. doi:10.1002/cncr.25327.
15. Jonasch E, Corn P, Pagliaro LC, et al. Upfront, randomized, phase 2 trial of sorafenib versus sorafenib and low-dose interferon alfa in patients with advanced renal cell carcinoma: clinical and biomarker analysis. *Cancer*. 2010;116(1):57-65. doi:10.1002/cncr.24685.
16. Amato R, Zhai J, Willis J, Saxena S, DeFoe M. A phase II trial of inpatient dose-escalated sorafenib in patients with metastatic renal cell carcinoma. *Clin Genitourin Cancer*. 2012;10(3):153-158. doi:10.1016/j.clgc.2012.03.001.
17. Bellmunt J, Maroto-Rey P, Trigo JM, et al. A phase II trial of first-line sorafenib in patients with metastatic renal cell carcinoma unwilling to receive or with early intolerance to immunotherapy: SOGUG Study 06-01. *Clin Transl Oncol Off Publ Fed Span Oncol Soc Natl Cancer Inst Mex*. 2010;12(7):503-508. doi:10.1007/s12094-010-0544-2.
18. Ott PA, Hamilton A, Min C, et al. A phase II trial of sorafenib in metastatic melanoma with tissue correlates. *PLoS One*. 2010;5(12):e15588. doi:10.1371/journal.pone.0015588.
19. Powles T, Kayani I, Blank C, et al. The safety and efficacy of sunitinib before planned nephrectomy in metastatic clear cell renal cancer. *Ann Oncol Off J Eur Soc Med Oncol ESMO*. 2011;22(5):1041-1047. doi:10.1093/annonc/mdq564.
20. Jonasch E, McCutcheon IE, Waguespack SG, et al. Pilot trial of sunitinib therapy in patients with von Hippel-Lindau disease. *Ann Oncol Off J Eur Soc Med Oncol ESMO*. 2011;22(12):2661-2666. doi:10.1093/annonc/mdr011.
21. Lee J-L, Ahn J-H, Lim HY, et al. Multicenter phase II study of sunitinib in patients with non-clear cell renal cell carcinoma. *Ann Oncol*. 2012:mdr586. doi:10.1093/annonc/mdr586.
22. Barrios CH, Hernandez-Barajas D, Brown MP, et al. Phase II trial of continuous once-daily dosing of sunitinib as first-line treatment in patients with metastatic renal cell carcinoma. *Cancer*. 2012;118(5):1252-1259. doi:10.1002/cncr.26440.
23. Motzer RJ, Hutson TE, Olsen MR, et al. Randomized phase II trial of sunitinib on an intermittent versus continuous dosing schedule as first-line therapy for advanced renal cell carcinoma. *J Clin Oncol Off J Am Soc Clin Oncol*. 2012;30(12):1371-1377. doi:10.1200/JCO.2011.36.4133.
24. Tomita Y, Shinohara N, Yuasa T, et al. Overall survival and updated results from a phase II study of sunitinib in Japanese patients with metastatic renal cell carcinoma. *Jpn J Clin Oncol*. 2010;40(12):1166-1172. doi:10.1093/jjco/hyq146.
25. Bex A, Blank C, Meinhardt W, van Tinteren H, Horenblas S, Haanen J. A phase II study of presurgical sunitinib in patients with metastatic clear-cell renal carcinoma and the primary tumor in situ. *Urology*. 2011;78(4):832-837. doi:10.1016/j.urology.2011.05.034.

26. Oza AM, Elit L, Tsao M-S, et al. Phase II study of temsirolimus in women with recurrent or metastatic endometrial cancer: a trial of the NCIC Clinical Trials Group. *J Clin Oncol Off J Am Soc Clin Oncol*. 2011;29(24):3278-3285. doi:10.1200/JCO.2010.34.1578.
27. Massuti B, Cobo M, Camps C, et al. Trabectedin in patients with advanced non-small-cell lung cancer (NSCLC) with XPG and/or ERCC1 overexpression and BRCA1 underexpression and pretreated with platinum. *Lung Cancer Amst Neth*. 2012;76(3):354-361. doi:10.1016/j.lungcan.2011.12.002.
28. Schmidt M, Scheulen ME, Dittrich C, et al. An open-label, randomized phase II study of adecatumumab, a fully human anti-EpCAM antibody, as monotherapy in patients with metastatic breast cancer. *Ann Oncol Off J Eur Soc Med Oncol ESMO*. 2010;21(2):275-282. doi:10.1093/annonc/mdp314.
29. Yang JC-H, Shih J-Y, Su W-C, et al. Afatinib for patients with lung adenocarcinoma and epidermal growth factor receptor mutations (LUX-Lung 2): a phase 2 trial. *Lancet Oncol*. 2012;13(5):539-548. doi:10.1016/S1470-2045(12)70086-4.
30. Miller VA, Hirsh V, Cadranel J, et al. Afatinib versus placebo for patients with advanced, metastatic non-small-cell lung cancer after failure of erlotinib, gefitinib, or both, and one or two lines of chemotherapy (LUX-Lung 1): a phase 2b/3 randomised trial. *Lancet Oncol*. 2012;13(5):528-538. doi:10.1016/S1470-2045(12)70087-6.
31. Lin NU, Winer EP, Wheatley D, et al. A phase II study of afatinib (BIBW 2992), an irreversible ErbB family blocker, in patients with HER2-positive metastatic breast cancer progressing after trastuzumab. *Breast Cancer Res Treat*. 2012;133(3):1057-1065. doi:10.1007/s10549-012-2003-y.
32. Morris MJ, Eisenberger MA, Pili R, et al. A phase I/IIA study of AGS-PSCA for castration-resistant prostate cancer. *Ann Oncol Off J Eur Soc Med Oncol ESMO*. 2012;23(10):2714-2719. doi:10.1093/annonc/mds078.
33. Bezares RF, Stemelin G, Diaz A, et al. Multicenter study of subcutaneous alemtuzumab administered at reduced dose in patients with fludarabine-relapsed/refractory chronic lymphocytic leukemia: final analysis. *Leuk Lymphoma*. 2011;52(10):1936-1941. doi:10.3109/10428194.2011.584991.
34. Cortes JE, Kantarjian HM, Brümmendorf TH, et al. Safety and efficacy of bosutinib (SKI-606) in chronic phase Philadelphia chromosome-positive chronic myeloid leukemia patients with resistance or intolerance to imatinib. *Blood*. 2011;118(17):4567-4576. doi:10.1182/blood-2011-05-355594.
35. Jabbour E, Kantarjian H, O'Brien S, et al. Predictive factors for outcome and response in patients treated with second-generation tyrosine kinase inhibitors for chronic myeloid leukemia in chronic phase after imatinib failure. *Blood*. 2011;117(6):1822-1827. doi:10.1182/blood-2010-07-293977.
36. Foà R, Vitale A, Vignetti M, et al. Dasatinib as first-line treatment for adult patients with Philadelphia chromosome-positive acute lymphoblastic leukemia. *Blood*. 2011;118(25):6521-6528. doi:10.1182/blood-2011-05-351403.

37. Thomas D, Henshaw R, Skubitz K, et al. Denosumab in patients with giant-cell tumour of bone: an open-label, phase 2 study. *Lancet Oncol*. 2010;11(3):275-280. doi:10.1016/S1470-2045(10)70010-3.
38. Wu Y-L, Zhou C, Cheng Y, et al. Erlotinib as second-line treatment in patients with advanced non-small-cell lung cancer and asymptomatic brain metastases: a phase II study (CTONG-0803). *Ann Oncol Off J Eur Soc Med Oncol ESMO*. 2013;24(4):993-999. doi:10.1093/annonc/mds529.
39. Takahashi T, Yamamoto N, Nukiwa T, et al. Phase II study of erlotinib in Japanese patients with advanced non-small cell lung cancer. *Anticancer Res*. 2010;30(2):557-563.
40. Choi DR, Lee DH, Choi C-M, Kim S-W, Suh C, Lee J-S. Erlotinib in first-line therapy for non-small cell lung cancer: a prospective phase II study. *Anticancer Res*. 2011;31(10):3457-3462.
41. Lee DH, Kim S-W, Suh C, Han YH, Lee J-S. Phase II study of erlotinib for chemotherapy-naïve patients with advanced or metastatic non-small cell lung cancer who are ineligible for platinum doublets. *Cancer Chemother Pharmacol*. 2011;67(1):35-39. doi:10.1007/s00280-010-1280-6.
42. Ilson DH, Kelsen D, Shah M, et al. A Phase II Trial of Erlotinib in Patients with Previously Treated Squamous Cell and Adenocarcinoma of the Esophagus. *Cancer*. 2011;117(7):1409-1414. doi:10.1002/cncr.25602.
43. Pallis AG, Voutsina A, Kentepozidis N, et al. A phase II trial of erlotinib as front-line treatment in clinically selected patients with non-small-cell lung cancer. *Clin Lung Cancer*. 2012;13(2):129-135. doi:10.1016/j.clcc.2011.08.004.
44. O'Brien MER, Myerson JS, Coward JIG, et al. A phase II study of <sup>18</sup>F-fluorodeoxyglucose PET-CT in non-small cell lung cancer patients receiving erlotinib (Tarceva); objective and symptomatic responses at 6 and 12 weeks. *Eur J Cancer Oxf Engl 1990*. 2012;48(1):68-74. doi:10.1016/j.ejca.2011.10.033.
45. Jänne PA, Wang X, Socinski MA, et al. Randomized phase II trial of erlotinib alone or with carboplatin and paclitaxel in patients who were never or light former smokers with advanced lung adenocarcinoma: CALGB 30406 trial. *J Clin Oncol Off J Am Soc Clin Oncol*. 2012;30(17):2063-2069. doi:10.1200/JCO.2011.40.1315.
46. Kim ST, Uhm JE, Lee J, et al. Randomized phase II study of gefitinib versus erlotinib in patients with advanced non-small cell lung cancer who failed previous chemotherapy. *Lung Cancer Amst Neth*. 2012;75(1):82-88. doi:10.1016/j.lungcan.2011.05.022.
47. Milella M, Nuzzo C, Bria E, et al. EGFR molecular profiling in advanced NSCLC: a prospective phase II study in molecularly/clinically selected patients pretreated with chemotherapy. *J Thorac Oncol Off Publ Int Assoc Study Lung Cancer*. 2012;7(4):672-680. doi:10.1097/JTO.0b013e31824a8bde.
48. Asami K, Koizumi T, Hirai K, et al. Gefitinib as first-line treatment in elderly epidermal growth factor receptor-mutated patients with advanced lung adenocarcinoma: results of a Nagano Lung Cancer Research Group study. *Clin Lung Cancer*. 2011;12(6):387-392. doi:10.1016/j.clcc.2011.02.004.

49. Adelstein DJ, Rodriguez CP, Rybicki LA, Ives DI, Rice TW. A phase II trial of gefitinib for recurrent or metastatic cancer of the esophagus or gastroesophageal junction. *Invest New Drugs*. 2012;30(4):1684-1689. doi:10.1007/s10637-011-9736-z.
50. Chen Y-M, Fan W-C, Tsai C-M, et al. A phase II randomized trial of gefitinib alone or with tegafur/uracil treatment in patients with pulmonary adenocarcinoma who had failed previous chemotherapy. *J Thorac Oncol Off Publ Int Assoc Study Lung Cancer*. 2011;6(6):1110-1116. doi:10.1097/JTO.0b013e3182121c09.
51. Maemondo M, Minegishi Y, Inoue A, et al. First-line gefitinib in patients aged 75 or older with advanced non-small cell lung cancer harboring epidermal growth factor receptor mutations: NEJ 003 study. *J Thorac Oncol Off Publ Int Assoc Study Lung Cancer*. 2012;7(9):1417-1422. doi:10.1097/JTO.0b013e318260de8b.
52. Kim D-W, Lee S-H, Lee JS, et al. A multicenter phase II study to evaluate the efficacy and safety of gefitinib as first-line treatment for Korean patients with advanced pulmonary adenocarcinoma harboring EGFR mutations. *Lung Cancer Amst Neth*. 2011;71(1):65-69. doi:10.1016/j.lungcan.2010.04.005.
53. Oh I-J, Ban H-J, Kim K-S, Kim Y-C. Retreatment of gefitinib in patients with non-small-cell lung cancer who previously controlled to gefitinib: a single-arm, open-label, phase II study. *Lung Cancer Amst Neth*. 2012;77(1):121-127. doi:10.1016/j.lungcan.2012.01.012.
54. Deng J, Fang WJ, Zhang XC, et al. Phase II trial of gefitinib in pretreated Chinese women with advanced non-small-cell lung cancer. *Med Oncol Northwood Lond Engl*. 2012;29(2):595-599. doi:10.1007/s12032-011-9891-2.
55. Park SJ, Kim HT, Lee DH, et al. Efficacy of epidermal growth factor receptor tyrosine kinase inhibitors for brain metastasis in non-small cell lung cancer patients harboring either exon 19 or 21 mutation. *Lung Cancer Amst Neth*. 2012;77(3):556-560. doi:10.1016/j.lungcan.2012.05.092.
56. Amadori S, Suci S, Selleslag D, et al. Randomized trial of two schedules of low-dose gemtuzumab ozogamicin as induction monotherapy for newly diagnosed acute myeloid leukaemia in older patients not considered candidates for intensive chemotherapy. A phase II study of the EORTC and GIMEMA leukaemia groups (AML-19). *Br J Haematol*. 2010;149(3):376-382. doi:10.1111/j.1365-2141.2010.08095.x.
57. Kindmark H, Janson ET, Gustavsson B, et al. Five patients with malignant endocrine tumors treated with imatinib mesylate (Glivec). *Acta Oncol Stockh Swed*. 2010;49(1):100-101. doi:10.3109/02841860902897707.
58. Samlowski WE, Moon J, Tuthill RJ, et al. A phase II trial of imatinib mesylate in merkel cell carcinoma (neuroendocrine carcinoma of the skin): A Southwest Oncology Group study (S0331). *Am J Clin Oncol*. 2010;33(5):495-499. doi:10.1097/COC.0b013e3181b9cf04.
59. Chao J, Budd GT, Chu P, et al. Phase II clinical trial of imatinib mesylate in therapy of KIT and/or PDGFR $\alpha$ -expressing Ewing sarcoma family of tumors and desmoplastic small round cell tumors. *Anticancer Res*. 2010;30(2):547-552.
60. Grignani G, Palmerini E, Stacchiotti S, et al. A phase 2 trial of imatinib mesylate in patients with recurrent nonresectable chondrosarcomas expressing platelet-derived growth factor receptor- $\alpha$  or - $\beta$ : An Italian Sarcoma Group study. *Cancer*. 2011;117(4):826-831. doi:10.1002/cncr.25632.

61. Cortes J, Quintás-Cardama A, Jones D, et al. Immune modulation of minimal residual disease in early chronic phase chronic myelogenous leukemia: a randomized trial of frontline high-dose imatinib mesylate with or without pegylated interferon alpha-2b and granulocyte-macrophage colony-stimulating factor. *Cancer*. 2011;117(3):572-580. doi:10.1002/cncr.25438.
62. Kérob D, Porcher R, Vérola O, et al. Imatinib mesylate as a preoperative therapy in dermatofibrosarcoma: results of a multicenter phase II study on 25 patients. *Clin Cancer Res Off J Am Assoc Cancer Res*. 2010;16(12):3288-3295. doi:10.1158/1078-0432.CCR-09-3401.
63. Huh WK, Sill MW, Darcy KM, et al. Efficacy and safety of imatinib mesylate (Gleevec) and immunohistochemical expression of c-Kit and PDGFR-beta in a Gynecologic Oncology Group Phase II Trial in women with recurrent or persistent carcinosarcomas of the uterus. *Gynecol Oncol*. 2010;117(2):248-254. doi:10.1016/j.ygyno.2010.01.002.
64. White DL, Dang P, Engler J, et al. Functional activity of the OCT-1 protein is predictive of long-term outcome in patients with chronic-phase chronic myeloid leukemia treated with imatinib. *J Clin Oncol Off J Am Soc Clin Oncol*. 2010;28(16):2761-2767. doi:10.1200/JCO.2009.26.5819.
65. Guo J, Si L, Kong Y, et al. Phase II, open-label, single-arm trial of imatinib mesylate in patients with metastatic melanoma harboring c-Kit mutation or amplification. *J Clin Oncol Off J Am Soc Clin Oncol*. 2011;29(21):2904-2909. doi:10.1200/JCO.2010.33.9275.
66. Aziz Z, Iqbal J, Bano K, Faisal M, Akram M. Sustained superior long-term outcomes and cytogenetic responses with imatinib mesylate in chronic phase chronic myeloid leukaemia: report from a developing country. *Jpn J Clin Oncol*. 2010;40(6):549-555. doi:10.1093/jjco/hyq012.
67. Castagnetti F, Testoni N, Luatti S, et al. Deletions of the derivative chromosome 9 do not influence the response and the outcome of chronic myeloid leukemia in early chronic phase treated with imatinib mesylate: GIMEMA CML Working Party analysis. *J Clin Oncol Off J Am Soc Clin Oncol*. 2010;28(16):2748-2754. doi:10.1200/JCO.2009.26.7963.
68. Ha HT, Lee JS, Urba S, et al. A phase II study of imatinib in patients with advanced anaplastic thyroid cancer. *Thyroid Off J Am Thyroid Assoc*. 2010;20(9):975-980. doi:10.1089/thy.2010.0057.
69. Cristofanilli M, Johnston SRD, Manikhas A, et al. A randomized phase II study of lapatinib + pazopanib versus lapatinib in patients with HER2+ inflammatory breast cancer. *Breast Cancer Res Treat*. 2013;137(2):471-482. doi:10.1007/s10549-012-2369-x.
70. Leslie KK, Sill MW, Lankes HA, et al. Lapatinib and potential prognostic value of EGFR mutations in a Gynecologic Oncology Group phase II trial of persistent or recurrent endometrial cancer. *Gynecol Oncol*. 2012;127(2):345-350. doi:10.1016/j.ygyno.2012.07.127.
71. Santos FPS, Kantarjian HM, Jain N, et al. Phase 2 study of CEP-701, an orally available JAK2 inhibitor, in patients with primary or post-polycythemia vera/essential thrombocythemia myelofibrosis. *Blood*. 2010;115(6):1131-1136. doi:10.1182/blood-2009-10-246363.
72. Fischer T, Stone RM, Deangelo DJ, et al. Phase IIB trial of oral Midostaurin (PKC412), the FMS-like tyrosine kinase 3 receptor (FLT3) and multi-targeted kinase inhibitor, in patients with acute myeloid leukemia and high-risk myelodysplastic syndrome with either wild-type or mutated FLT3. *J Clin Oncol Off J Am Soc Clin Oncol*. 2010;28(28):4339-4345. doi:10.1200/JCO.2010.28.9678.

73. Sawaki A, Yamada Y, Komatsu Y, et al. Phase II study of motesanib in Japanese patients with advanced gastrointestinal stromal tumors with prior exposure to imatinib mesylate. *Cancer Chemother Pharmacol*. 2010;65(5):961-967. doi:10.1007/s00280-009-1103-9.
74. Benjamin RS, Schöffski P, Hartmann JT, et al. Efficacy and safety of motesanib, an oral inhibitor of VEGF, PDGF, and Kit receptors, in patients with imatinib-resistant gastrointestinal stromal tumors. *Cancer Chemother Pharmacol*. 2011;68(1):69-77. doi:10.1007/s00280-010-1431-9.
75. Rudin CM, Hann CL, Garon EB, et al. Phase II study of single-agent navitoclax (ABT-263) and biomarker correlates in patients with relapsed small cell lung cancer. *Clin Cancer Res Off J Am Assoc Cancer Res*. 2012;18(11):3163-3169. doi:10.1158/1078-0432.CCR-11-3090.
76. Sequist LV, Besse B, Lynch TJ, et al. Neratinib, an irreversible pan-ErbB receptor tyrosine kinase inhibitor: results of a phase II trial in patients with advanced non-small-cell lung cancer. *J Clin Oncol Off J Am Soc Clin Oncol*. 2010;28(18):3076-3083. doi:10.1200/JCO.2009.27.9414.
77. Burstein HJ, Sun Y, Dirix LY, et al. Neratinib, an irreversible ErbB receptor tyrosine kinase inhibitor, in patients with advanced ErbB2-positive breast cancer. *J Clin Oncol Off J Am Soc Clin Oncol*. 2010;28(8):1301-1307. doi:10.1200/JCO.2009.25.8707.
78. Kantarjian HM, Giles FJ, Bhalla KN, et al. Nilotinib is effective in patients with chronic myeloid leukemia in chronic phase after imatinib resistance or intolerance: 24-month follow-up results. *Blood*. 2011;117(4):1141-1145. doi:10.1182/blood-2010-03-277152.
79. Nicolini FE, Turkina A, Shen Z-X, et al. Expanding Nilotinib Access in Clinical Trials (ENACT): an open-label, multicenter study of oral nilotinib in adult patients with imatinib-resistant or imatinib-intolerant Philadelphia chromosome-positive chronic myeloid leukemia in the chronic phase. *Cancer*. 2012;118(1):118-126. doi:10.1002/cncr.26249.
80. Giles FJ, Abruzzese E, Rosti G, et al. Nilotinib is active in chronic and accelerated phase chronic myeloid leukemia following failure of imatinib and dasatinib therapy. *Leuk Off J Leuk Soc Am Leuk Res Fund UK*. 2010;24(7):1299-1301. doi:10.1038/leu.2010.110.
81. Le Coutre PD, Giles FJ, Hochhaus A, et al. Nilotinib in patients with Ph+ chronic myeloid leukemia in accelerated phase following imatinib resistance or intolerance: 24-month follow-up results. *Leukemia*. 2012;26(6):1189-1194. doi:10.1038/leu.2011.323.
82. Morschhauser F, Marlton P, Vitolo U, et al. Results of a phase I/II study of ocrelizumab, a fully humanized anti-CD20 mAb, in patients with relapsed/refractory follicular lymphoma. *Ann Oncol Off J Eur Soc Med Oncol ESMO*. 2010;21(9):1870-1876. doi:10.1093/annonc/mdq027.
83. Wierda WG, Padmanabhan S, Chan GW, et al. Ofatumumab is active in patients with fludarabine-refractory CLL irrespective of prior rituximab: results from the phase 2 international study. *Blood*. 2011;118(19):5126-5129. doi:10.1182/blood-2011-04-348656.
84. Coiffier B, Losic N, Rønn BB, et al. Pharmacokinetics and pharmacokinetic/pharmacodynamic associations of ofatumumab, a human monoclonal CD20 antibody, in patients with relapsed or refractory chronic lymphocytic leukaemia: a phase 1-2 study. *Br J Haematol*. 2010;150(1):58-71. doi:10.1111/j.1365-2141.2010.08193.x.
85. Bible KC, Suman VJ, Molina JR, et al. Efficacy of pazopanib in progressive, radioiodine-refractory, metastatic differentiated thyroid cancers: results of a phase 2 consortium study. *Lancet Oncol*. 2010;11(10):962-972. doi:10.1016/S1470-2045(10)70203-5.

86. George S, Wang Q, Heinrich MC, et al. Efficacy and Safety of Regorafenib in Patients With Metastatic and/or Unresectable GI Stromal Tumor After Failure of Imatinib and Sunitinib: A Multicenter Phase II Trial. *J Clin Oncol*. 2012;30(19):2401-2407. doi:10.1200/JCO.2011.39.9394.
87. Eichenauer DA, Fuchs M, Pluetschow A, et al. Phase 2 study of rituximab in newly diagnosed stage IA nodular lymphocyte-predominant Hodgkin lymphoma: a report from the German Hodgkin Study Group. *Blood*. 2011;118(16):4363-4365. doi:10.1182/blood-2011-06-361055.
88. Strosberg JR, Yeatman T, Weber J, et al. A phase II study of RO4929097 in metastatic colorectal cancer. *Eur J Cancer Oxf Engl 1990*. 2012;48(7):997-1003. doi:10.1016/j.ejca.2012.02.056.
89. Verstovsek S, Kantarjian H, Mesa RA, et al. Safety and Efficacy of INCB018424, a JAK1 and JAK2 Inhibitor, in Myelofibrosis. *N Engl J Med*. 2010;363(12):1117-1127. doi:10.1056/NEJMoa1002028.
90. Riely GJ, Johnson ML, Medina C, et al. A phase II trial of Salirasib in patients with lung adenocarcinomas with KRAS mutations. *J Thorac Oncol Off Publ Int Assoc Study Lung Cancer*. 2011;6(8):1435-1437. doi:10.1097/JTO.0b013e318223c099.
91. Hayes DN, Lucas AS, Tanvetyanon T, et al. Phase II efficacy and pharmacogenomic study of Selumetinib (AZD6244; ARRY-142886) in iodine-131 refractory papillary thyroid carcinoma with or without follicular elements. *Clin Cancer Res Off J Am Assoc Cancer Res*. 2012;18(7):2056-2065. doi:10.1158/1078-0432.CCR-11-0563.
92. Dabora SL, Franz DN, Ashwal S, et al. Multicenter phase 2 trial of sirolimus for tuberous sclerosis: kidney angiomyolipomas and other tumors regress and VEGF- D levels decrease. *PLoS One*. 2011;6(9):e23379. doi:10.1371/journal.pone.0023379.
93. Dingemans A-MC, Mellema WW, Groen HJM, et al. A phase II study of sorafenib in patients with platinum-pretreated, advanced (Stage IIIb or IV) non-small cell lung cancer with a KRAS mutation. *Clin Cancer Res Off J Am Assoc Cancer Res*. 2013;19(3):743-751. doi:10.1158/1078-0432.CCR-12-1779.
94. Schneider TC, Abdulrahman RM, Corssmit EP, Morreau H, Smit JWA, Kapiteijn E. Long-term analysis of the efficacy and tolerability of sorafenib in advanced radio-iodine refractory differentiated thyroid carcinoma: final results of a phase II trial. *Eur J Endocrinol Eur Fed Endocr Soc*. 2012;167(5):643-650. doi:10.1530/EJE-12-0405.
95. Shirao K, Nishida T, Doi T, et al. Phase I/II study of sunitinib malate in Japanese patients with gastrointestinal stromal tumor after failure of prior treatment with imatinib mesylate. *Invest New Drugs*. 2010;28(6):866-875. doi:10.1007/s10637-009-9306-9.
96. Tamura K, Shimizu C, Hojo T, et al. FcyR2A and 3A polymorphisms predict clinical outcome of trastuzumab in both neoadjuvant and metastatic settings in patients with HER2-positive breast cancer. *Ann Oncol Off J Eur Soc Med Oncol ESMO*. 2011;22(6):1302-1307. doi:10.1093/annonc/mdq585.
97. Chevallier P, Robillard N, Charbonnier A, et al. Trastuzumab for treatment of refractory/relapsed HER2-positive adult B-ALL: results of a phase 2 GRAALL study. *Blood*. 2012;119(11):2474-2477. doi:10.1182/blood-2011-11-390781.

98. Fleming GF, Sill MW, Darcy KM, et al. Phase II trial of trastuzumab in women with advanced or recurrent, HER2-positive endometrial carcinoma: a Gynecologic Oncology Group study. *Gynecol Oncol*. 2010;116(1):15-20. doi:10.1016/j.ygyno.2009.09.025.
99. Leyland-Jones B, Colomer R, Trudeau ME, et al. Intensive loading dose of trastuzumab achieves higher-than-steady-state serum concentrations and is well tolerated. *J Clin Oncol Off J Am Soc Clin Oncol*. 2010;28(6):960-966. doi:10.1200/JCO.2009.23.1910.
100. Burris HA, Rugo HS, Vukelja SJ, et al. Phase II study of the antibody drug conjugate trastuzumab-DM1 for the treatment of human epidermal growth factor receptor 2 (HER2)-positive breast cancer after prior HER2-directed therapy. *J Clin Oncol Off J Am Soc Clin Oncol*. 2011;29(4):398-405. doi:10.1200/JCO.2010.29.5865.
101. Krop IE, LoRusso P, Miller KD, et al. A phase II study of trastuzumab emtansine in patients with human epidermal growth factor receptor 2-positive metastatic breast cancer who were previously treated with trastuzumab, lapatinib, an anthracycline, a taxane, and capecitabine. *J Clin Oncol Off J Am Soc Clin Oncol*. 2012;30(26):3234-3241. doi:10.1200/JCO.2011.40.5902.
102. Wells SA Jr, Gosnell JE, Gagel RF, et al. Vandetanib for the treatment of patients with locally advanced or metastatic hereditary medullary thyroid cancer. *J Clin Oncol Off J Am Soc Clin Oncol*. 2010;28(5):767-772. doi:10.1200/JCO.2009.23.6604.
103. Pietanza MC, Gadgeel SM, Dowlati A, et al. Phase II study of the multitargeted tyrosine kinase inhibitor XL647 in patients with non-small-cell lung cancer. *J Thorac Oncol Off Publ Int Assoc Study Lung Cancer*. 2012;7(5):856-865. doi:10.1097/JTO.0b013e31824c943f.
104. D'Amore F, Radford J, Relander T, et al. Phase II trial of zanolimumab (HuMax-CD4) in relapsed or refractory non-cutaneous peripheral T cell lymphoma. *Br J Haematol*. 2010;150(5):565-573. doi:10.1111/j.1365-2141.2010.08298.x.
105. Gartner EM, Silverman P, Simon M, et al. A phase II study of 17-allylamino-17-demethoxygeldanamycin in metastatic or locally advanced, unresectable breast cancer. *Breast Cancer Res Treat*. 2012;131(3):933-937. doi:10.1007/s10549-011-1866-7.
106. Bruce JY, Eickhoff J, Pili R, et al. A phase II study of 2-methoxyestradiol nanocrystal colloidal dispersion alone and in combination with sunitinib malate in patients with metastatic renal cell carcinoma progressing on sunitinib malate. *Invest New Drugs*. 2012;30(2):794-802. doi:10.1007/s10637-010-9618-9.
107. Geller MA, Cooley S, Argenta PA, et al. Toll-like receptor-7 agonist administered subcutaneously in a prolonged dosing schedule in heavily pretreated recurrent breast, ovarian, and cervix cancers. *Cancer Immunol Immunother Cll*. 2010;59(12):1877-1884. doi:10.1007/s00262-010-0914-1.
108. Spaner DE, Shi Y, White D, et al. A phase I/II trial of TLR-7 agonist immunotherapy in chronic lymphocytic leukemia. *Leukemia*. 2010;24(1):222-226. doi:10.1038/leu.2009.195.
109. Schuler M, Awada A, Harter P, et al. A phase II trial to assess efficacy and safety of afatinib in extensively pretreated patients with HER2-negative metastatic breast cancer. *Breast Cancer Res Treat*. 2012;134(3):1149-1159. doi:10.1007/s10549-012-2126-1.
110. Sideras K, Dueck AC, Hobday TJ, et al. North central cancer treatment group (NCCTG) N0537: phase II trial of VEGF-trap in patients with metastatic breast cancer previously treated with an



anthracycline and/or a taxane. *Clin Breast Cancer*. 2012;12(6):387-391.  
doi:10.1016/j.clbc.2012.09.007.

111. Tarhini AA, Frankel P, Margolin KA, et al. Aflibercept (VEGF Trap) in inoperable stage III or stage IV melanoma of cutaneous or uveal origin. *Clin Cancer Res Off J Am Assoc Cancer Res*. 2011;17(20):6574-6581. doi:10.1158/1078-0432.CCR-11-1463.
112. Tang PA, Cohen SJ, Kollmannsberger C, et al. Phase II clinical and pharmacokinetic study of aflibercept in patients with previously treated metastatic colorectal cancer. *Clin Cancer Res Off J Am Assoc Cancer Res*. 2012;18(21):6023-6031. doi:10.1158/1078-0432.CCR-11-3252.
113. Mackay HJ, Buckanovich RJ, Hirte H, et al. A phase II study single agent of aflibercept (VEGF Trap) in patients with recurrent or metastatic gynecologic carcinosarcomas and uterine leiomyosarcoma. A trial of the Princess Margaret Hospital, Chicago and California Cancer Phase II Consortia. *Gynecol Oncol*. 2012;125(1):136-140. doi:10.1016/j.ygyno.2011.11.042.
114. Colombo N, Mangili G, Mammoliti S, et al. A phase II study of aflibercept in patients with advanced epithelial ovarian cancer and symptomatic malignant ascites. *Gynecol Oncol*. 2012;125(1):42-47. doi:10.1016/j.ygyno.2011.11.021.
115. Coleman RL, Sill MW, Lankes HA, et al. A phase II evaluation of aflibercept in the treatment of recurrent or persistent endometrial cancer: a Gynecologic Oncology Group study. *Gynecol Oncol*. 2012;127(3):538-543. doi:10.1016/j.ygyno.2012.08.020.
116. De Groot JF, Lamborn KR, Chang SM, et al. Phase II study of aflibercept in recurrent malignant glioma: a North American Brain Tumor Consortium study. *J Clin Oncol Off J Am Soc Clin Oncol*. 2011;29(19):2689-2695. doi:10.1200/JCO.2010.34.1636.
117. Leighl NB, Raez LE, Besse B, et al. A multicenter, phase 2 study of vascular endothelial growth factor trap (Aflibercept) in platinum- and erlotinib-resistant adenocarcinoma of the lung. *J Thorac Oncol Off Publ Int Assoc Study Lung Cancer*. 2010;5(7):1054-1059.
118. Twardowski P, Stadler WM, Frankel P, et al. Phase II study of Aflibercept (VEGF-Trap) in patients with recurrent or metastatic urothelial cancer, a California Cancer Consortium Trial. *Urology*. 2010;76(4):923-926. doi:10.1016/j.urology.2010.04.025.
119. Matulonis UA, Sharma S, Ghamande S, et al. Phase II study of MLN8237 (alisertib), an investigational Aurora A kinase inhibitor, in patients with platinum-resistant or -refractory epithelial ovarian, fallopian tube, or primary peritoneal carcinoma. *Gynecol Oncol*. 2012;127(1):63-69. doi:10.1016/j.ygyno.2012.06.040.
120. O'Brien MER, Konopa K, Lorigan P, et al. Randomised phase II study of amrubicin as single agent or in combination with cisplatin versus cisplatin etoposide as first-line treatment in patients with extensive stage small cell lung cancer - EORTC 08062. *Eur J Cancer Oxf Engl 1990*. 2011;47(15):2322-2330. doi:10.1016/j.ejca.2011.05.020.
121. Jotte R, Conkling P, Reynolds C, et al. Randomized phase II trial of single-agent amrubicin or topotecan as second-line treatment in patients with small-cell lung cancer sensitive to first-line platinum-based chemotherapy. *J Clin Oncol Off J Am Soc Clin Oncol*. 2011;29(3):287-293. doi:10.1200/JCO.2010.29.8851.
122. Kaneda H, Okamoto I, Hayashi H, et al. Phase II trial of amrubicin for second-line treatment of advanced non-small cell lung cancer: results of the West Japan Thoracic Oncology Group trial

(WJTOG0401). *J Thorac Oncol Off Publ Int Assoc Study Lung Cancer*. 2010;5(1):105-109. doi:10.1097/JTO.0b013e3181c07c6c.

123. Kaira K, Sunaga N, Tomizawa Y, et al. A phase II study of amrubicin, a synthetic 9-aminoanthracycline, in patients with previously treated lung cancer. *Lung Cancer Amst Neth*. 2010;69(1):99-104. doi:10.1016/j.lungcan.2009.09.012.
124. Morrow PK, Murthy RK, Ensor JD, et al. An open-label, phase 2 trial of RPI.4610 (Angiozyme) in the treatment of metastatic breast cancer. *Cancer*. 2012;118(17):4098-4104. doi:10.1002/cncr.26730.
125. Yang T-S, Lu S-N, Chao Y, et al. A randomised phase II study of pegylated arginine deiminase (ADI-PEG 20) in Asian advanced hepatocellular carcinoma patients. *Br J Cancer*. 2010;103(7):954-960. doi:10.1038/sj.bjc.6605856.
126. Sanaat Z, Rezazadeh M, Gharamaleki JV, Ziae JE, Esfahani A. Arsenic trioxide in patients with refractory multiple myeloma: a prospective, phase II, single-arm study. *Acta Med Iran*. 2011;49(8):504-508.
127. Fruehauf J, Lutzky J, McDermott D, et al. Multicenter, phase II study of axitinib, a selective second-generation inhibitor of vascular endothelial growth factor receptors 1, 2, and 3, in patients with metastatic melanoma. *Clin Cancer Res Off J Am Assoc Cancer Res*. 2011;17(23):7462-7469. doi:10.1158/1078-0432.CCR-11-0534.
128. Uchida T, Ogawa Y, Kobayashi Y, et al. Phase I and II study of azacitidine in Japanese patients with myelodysplastic syndromes. *Cancer Sci*. 2011;102(9):1680-1686. doi:10.1111/j.1349-7006.2011.01993.x.
129. Malik A, Shoukier M, Garcia-Manero G, et al. Azacitidine in fludarabine-refractory chronic lymphocytic leukemia: a phase II study. *Clin Lymphoma Myeloma Leuk*. 2013;13(3):292-295. doi:10.1016/j.clml.2012.11.009.
130. Al-Ali HK, Jaekel N, Junghanss C, et al. Azacitidine in patients with acute myeloid leukemia medically unfit for or resistant to chemotherapy: a multicenter phase I/II study. *Leuk Lymphoma*. 2012;53(1):110-117. doi:10.3109/10428194.2011.606382.
131. Löwenberg B, Muus P, Ossenkoppele G, et al. Phase 1/2 study to assess the safety, efficacy, and pharmacokinetics of barasertib (AZD1152) in patients with advanced acute myeloid leukemia. *Blood*. 2011;118(23):6030-6036. doi:10.1182/blood-2011-07-366930.
132. Schwandt A, Mekhail T, Halmos B, et al. Phase-II trial of rebeccamycin analog, a dual topoisomerase-I and -II inhibitor, in relapsed "sensitive" small cell lung cancer. *J Thorac Oncol Off Publ Int Assoc Study Lung Cancer*. 2012;7(4):751-754. doi:10.1097/JTO.0b013e31824abca2.
133. Cashen A, Juckett M, Jumonville A, et al. Phase II study of the histone deacetylase inhibitor belinostat (PXD101) for the treatment of myelodysplastic syndrome (MDS). *Ann Hematol*. 2012;91(1):33-38. doi:10.1007/s00277-011-1240-1.
134. Mackay HJ, Hirte H, Colgan T, et al. Phase II trial of the histone deacetylase inhibitor belinostat in women with platinum resistant epithelial ovarian cancer and micropapillary (LMP) ovarian tumours. *Eur J Cancer Oxf Engl 1990*. 2010;46(9):1573-1579. doi:10.1016/j.ejca.2010.02.047.

135. Giaccone G, Rajan A, Berman A, et al. Phase II study of belinostat in patients with recurrent or refractory advanced thymic epithelial tumors. *J Clin Oncol Off J Am Soc Clin Oncol*. 2011;29(15):2052-2059. doi:10.1200/JCO.2010.32.4467.
136. Hwang JH, Lim MC, Seo S-S, Park S-Y, Kang S. Phase II study of belotecan (CKD 602) as a single agent in patients with recurrent or progressive carcinoma of uterine cervix. *Jpn J Clin Oncol*. 2011;41(5):624-629. doi:10.1093/jjco/hyr017.
137. Jeong J, Cho BC, Sohn JH, et al. Belotecan for relapsing small-cell lung cancer patients initially treated with an irinotecan-containing chemotherapy: a phase II trial. *Lung Cancer Amst Neth*. 2010;70(1):77-81. doi:10.1016/j.lungcan.2010.01.006.
138. Kim SJ, Kim JS, Kim SC, et al. A multicenter phase II study of belotecan, new camptothecin analogue, in patients with previously untreated extensive stage disease small cell lung cancer. *Lung Cancer Amst Neth*. 2010;68(3):446-449. doi:10.1016/j.lungcan.2009.07.002.
139. Rhee CK, Lee SH, Kim JS, et al. A multicenter phase II study of belotecan, a new camptothecin analogue, as a second-line therapy in patients with small cell lung cancer. *Lung Cancer Amst Neth*. 2011;72(1):64-67. doi:10.1016/j.lungcan.2010.07.003.
140. Ohmachi K, Ando K, Ogura M, et al. Multicenter phase II study of bendamustine for relapsed or refractory indolent B-cell non-Hodgkin lymphoma and mantle cell lymphoma. *Cancer Sci*. 2010;101(9):2059-2064. doi:10.1111/j.1349-7006.2010.01635.x.
141. Chamberlain MC, Johnston SK. Salvage therapy with single agent bendamustine for recurrent glioblastoma. *J Neurooncol*. 2011;105(3):523-530. doi:10.1007/s11060-011-0612-7.
142. Baker AF, Roe DJ, Laughren C, et al. Investigation of bendamustine HCL in a phase 2 study in women with resistant ovarian cancer. *Invest New Drugs*. 2013;31(1):160-166. doi:10.1007/s10637-012-9827-5.
143. Astsaturov IA, Meropol NJ, Alpaugh RK, et al. Phase II and coagulation cascade biomarker study of bevacizumab with or without docetaxel in patients with previously treated metastatic pancreatic adenocarcinoma. *Am J Clin Oncol*. 2011;34(1):70-75. doi:10.1097/COC.0b013e3181d2734a.
144. Somlo G, Lashkari A, Bellamy W, et al. Phase II randomized trial of bevacizumab versus bevacizumab and thalidomide for relapsed/refractory multiple myeloma: a California Cancer Consortium trial. *Br J Haematol*. 2011;154(4):533-535. doi:10.1111/j.1365-2141.2011.08623.x.
145. Raizer JJ, Grimm S, Chamberlain MC, et al. A phase 2 trial of single-agent bevacizumab given in an every-3-week schedule for patients with recurrent high-grade gliomas. *Cancer*. 2010;116(22):5297-5305. doi:10.1002/cncr.25462.
146. Aghajanian C, Sill MW, Darcy KM, et al. Phase II trial of bevacizumab in recurrent or persistent endometrial cancer: a Gynecologic Oncology Group study. *J Clin Oncol Off J Am Soc Clin Oncol*. 2011;29(16):2259-2265. doi:10.1200/JCO.2010.32.6397.
147. Shanafelt T, Zent C, Byrd J, et al. Phase II trials of single-agent anti-VEGF therapy for patients with chronic lymphocytic leukemia. *Leuk Lymphoma*. 2010;51(12):2222-2229. doi:10.3109/10428194.2010.524327.

148. Kreisl TN, Zhang W, Odia Y, et al. A phase II trial of single-agent bevacizumab in patients with recurrent anaplastic glioma. *Neuro-Oncol*. 2011;13(10):1143-1150. doi:10.1093/neuonc/nor091.
149. Schuster C, Eikesdal HP, Puntervoll H, et al. Clinical efficacy and safety of bevacizumab monotherapy in patients with metastatic melanoma: predictive importance of induced early hypertension. *PLoS One*. 2012;7(6):e38364. doi:10.1371/journal.pone.0038364.
150. Schöffski P, Blay J-Y, De Greve J, et al. Multicentric parallel phase II trial of the polo-like kinase 1 inhibitor BI 2536 in patients with advanced head and neck cancer, breast cancer, ovarian cancer, soft tissue sarcoma and melanoma. The first protocol of the European Organization for Research and Treatment of Cancer (EORTC) Network Of Core Institutes (NOCI). *Eur J Cancer Oxf Engl 1990*. 2010;46(12):2206-2215. doi:10.1016/j.ejca.2010.03.039.
151. Sebastian M, Reck M, Waller CF, et al. The efficacy and safety of BI 2536, a novel Plk-1 inhibitor, in patients with stage IIIB/IV non-small cell lung cancer who had relapsed after, or failed, chemotherapy: results from an open-label, randomized phase II clinical trial. *J Thorac Oncol Off Publ Int Assoc Study Lung Cancer*. 2010;5(7):1060-1067. doi:10.1097/JTO.0b013e3181d95dd4.
152. Conconi A, Martinelli G, Lopez-Guillermo A, et al. Clinical activity of bortezomib in relapsed/refractory MALT lymphomas: results of a phase II study of the International Extranodal Lymphoma Study Group (IELSG). *Ann Oncol Off J Eur Soc Med Oncol ESMO*. 2011;22(3):689-695. doi:10.1093/annonc/mdq416.
153. Di Bella N, Taetle R, Kolibaba K, et al. Results of a phase 2 study of bortezomib in patients with relapsed or refractory indolent lymphoma. *Blood*. 2010;115(3):475-480. doi:10.1182/blood-2009-08-233155.
154. O'Connor OA, Portlock C, Moskowitz C, et al. Time to treatment response in patients with follicular lymphoma treated with bortezomib is longer compared with other histologic subtypes. *Clin Cancer Res Off J Am Assoc Cancer Res*. 2010;16(2):719-726. doi:10.1158/1078-0432.CCR-08-2647.
155. Lund T, Sjøe K, Abildgaard N, et al. First-line treatment with bortezomib rapidly stimulates both osteoblast activity and bone matrix deposition in patients with multiple myeloma, and stimulates osteoblast proliferation and differentiation in vitro. *Eur J Haematol*. 2010;85(4):290-299. doi:10.1111/j.1600-0609.2010.01485.x.
156. Shah MA, Power DG, Kindler HL, et al. A multicenter, phase II study of bortezomib (PS-341) in patients with unresectable or metastatic gastric and gastroesophageal junction adenocarcinoma. *Invest New Drugs*. 2011;29(6):1475-1481. doi:10.1007/s10637-010-9474-7.
157. Kim GP, Mahoney MR, Szydlo D, et al. An international, multicenter phase II trial of bortezomib in patients with hepatocellular carcinoma. *Invest New Drugs*. 2012;30(1):387-394. doi:10.1007/s10637-010-9532-1.
158. Ramalingam SS, Davies AM, Longmate J, et al. Bortezomib for patients with advanced-stage bronchioloalveolar carcinoma: a California Cancer Consortium Phase II study (NCI 7003). *J Thorac Oncol Off Publ Int Assoc Study Lung Cancer*. 2011;6(10):1741-1745. doi:10.1097/JTO.0b013e318225924c.

159. Goy A, Bernstein SH, McDonald A, et al. Potential biomarkers of bortezomib activity in mantle cell lymphoma from the phase 2 PINNACLE trial. *Leuk Lymphoma*. 2010;51(7):1269-1277. doi:10.3109/10428194.2010.483302.
160. Scagliotti GV, Germonpré P, Bosquée L, et al. A randomized phase II study of bortezomib and pemetrexed, in combination or alone, in patients with previously treated advanced non-small-cell lung cancer. *Lung Cancer Amst Neth*. 2010;68(3):420-426. doi:10.1016/j.lungcan.2009.07.011.
161. Li T, Ho L, Piperdi B, et al. Phase II study of the proteasome inhibitor bortezomib (PS-341, Velcade) in chemotherapy-naïve patients with advanced stage non-small cell lung cancer (NSCLC). *Lung Cancer Amst Neth*. 2010;68(1):89-93. doi:10.1016/j.lungcan.2009.05.009.
162. Besse B, Planchard D, Veillard A-S, et al. Phase 2 study of frontline bortezomib in patients with advanced non-small cell lung cancer. *Lung Cancer Amst Neth*. 2012;76(1):78-83. doi:10.1016/j.lungcan.2011.09.006.
163. Campone M, Bondarenko I, Brincat S, et al. Phase II study of single-agent bosutinib, a Src/Abl tyrosine kinase inhibitor, in patients with locally advanced or metastatic breast cancer pretreated with chemotherapy. *Ann Oncol Off J Eur Soc Med Oncol ESMO*. 2012;23(3):610-617. doi:10.1093/annonc/mdr261.
164. Park J-W, Finn RS, Kim JS, et al. Phase II, open-label study of brivanib as first-line therapy in patients with advanced hepatocellular carcinoma. *Clin Cancer Res Off J Am Assoc Cancer Res*. 2011;17(7):1973-1983. doi:10.1158/1078-0432.CCR-10-2011.
165. Smith DC, Smith MR, Sweeney C, et al. Cabozantinib in patients with advanced prostate cancer: results of a phase II randomized discontinuation trial. *J Clin Oncol Off J Am Soc Clin Oncol*. 2013;31(4):412-419. doi:10.1200/JCO.2012.45.0494.
166. Tsimafeyeu I, Demidov L, Kharkevich G, et al. Phase II, multicenter, uncontrolled trial of single-agent capecitabine in patients with non-clear cell metastatic renal cell carcinoma. *Am J Clin Oncol*. 2012;35(3):251-254. doi:10.1097/COC.0b013e31820dbc17.
167. Martinez-Trufero J, Isla D, Adansa JC, et al. Phase II study of capecitabine as palliative treatment for patients with recurrent and metastatic squamous head and neck cancer after previous platinum-based treatment. *Br J Cancer*. 2010;102(12):1687-1691. doi:10.1038/sj.bjc.6605697.
168. Medley L, Morel AN, Farrugia D, et al. Phase II study of single agent capecitabine in the treatment of metastatic non-pancreatic neuroendocrine tumours. *Br J Cancer*. 2011;104(7):1067-1070. doi:10.1038/bjc.2011.76.
169. Kusama M, Nomizu T, Aogi K, et al. Phase II study of 4-weekly capecitabine monotherapy in advanced/metastatic breast cancer. *Breast Cancer Tokyo Jpn*. 2010;17(4):233-240. doi:10.1007/s12282-009-0137-5.
170. Taguchi T, Nakayama T, Masuda N, et al. Study of low-dose capecitabine monotherapy for metastatic breast cancer. *Chemotherapy*. 2010;56(2):166-170. doi:10.1159/000313531.
171. Kaufmann M, Maass N, Costa SD, et al. First-line therapy with moderate dose capecitabine in metastatic breast cancer is safe and active: results of the MONICA trial. *Eur J Cancer Oxf Engl* 1990. 2010;46(18):3184-3191. doi:10.1016/j.ejca.2010.07.009.

172. Bennouna J, Lang I, Valladares-Ayerbes M, et al. A Phase II, open-label, randomised study to assess the efficacy and safety of the MEK1/2 inhibitor AZD6244 (ARRY-142886) versus capecitabine monotherapy in patients with colorectal cancer who have failed one or two prior chemotherapeutic regimens. *Invest New Drugs*. 2011;29(5):1021-1028. doi:10.1007/s10637-010-9392-8.
173. Bodoky G, Timcheva C, Spigel DR, et al. A phase II open-label randomized study to assess the efficacy and safety of selumetinib (AZD6244 [ARRY-142886]) versus capecitabine in patients with advanced or metastatic pancreatic cancer who have failed first-line gemcitabine therapy. *Invest New Drugs*. 2012;30(3):1216-1223. doi:10.1007/s10637-011-9687-4.
174. Zangari M, Aujay M, Zhan F, et al. Alkaline phosphatase variation during carfilzomib treatment is associated with best response in multiple myeloma patients. *Eur J Haematol*. 2011;86(6):484-487. doi:10.1111/j.1600-0609.2011.01602.x.
175. Pienta KJ, Machiels J-P, Schrijvers D, et al. Phase 2 study of carlumab (CNTO 888), a human monoclonal antibody against CC-chemokine ligand 2 (CCL2), in metastatic castration-resistant prostate cancer. *Invest New Drugs*. 2013;31(3):760-768. doi:10.1007/s10637-012-9869-8.
176. Alberts SR, Fitch TR, Kim GP, et al. Cediranib (AZD2171) in patients with advanced hepatocellular carcinoma: a phase II North Central Cancer Treatment Group Clinical Trial. *Am J Clin Oncol*. 2012;35(4):329-333. doi:10.1097/COC.0b013e3182118cdf.
177. Batchelor TT, Duda DG, di Tomaso E, et al. Phase II study of cediranib, an oral pan-vascular endothelial growth factor receptor tyrosine kinase inhibitor, in patients with recurrent glioblastoma. *J Clin Oncol Off J Am Soc Clin Oncol*. 2010;28(17):2817-2823. doi:10.1200/JCO.2009.26.3988.
178. Ramalingam SS, Belani CP, Mack PC, et al. Phase II study of Cediranib (AZD 2171), an inhibitor of the vascular endothelial growth factor receptor, for second-line therapy of small cell lung cancer (National Cancer Institute #7097). *J Thorac Oncol Off Publ Int Assoc Study Lung Cancer*. 2010;5(8):1279-1284. doi:10.1097/JTO.0b013e3181e2fcb0.
179. Chan JA, Blaszczewski LS, Enzinger PC, et al. A multicenter phase II trial of single-agent cetuximab in advanced esophageal and gastric adenocarcinoma. *Ann Oncol Off J Eur Soc Med Oncol ESMO*. 2011;22(6):1367-1373. doi:10.1093/annonc/mdq604.
180. Santini D, Vincenzi B, Addeo R, et al. Cetuximab rechallenge in metastatic colorectal cancer patients: how to come away from acquired resistance? *Ann Oncol Off J Eur Soc Med Oncol ESMO*. 2012;23(9):2313-2318. doi:10.1093/annonc/mdr623.
181. Sastre J, Aranda E, Grávalos C, et al. First-line single-agent cetuximab in elderly patients with metastatic colorectal cancer. A phase II clinical and molecular study of the Spanish group for digestive tumor therapy (TTD). *Crit Rev Oncol Hematol*. 2011;77(1):78-84. doi:10.1016/j.critrevonc.2009.11.005.
182. Santin AD, Sill MW, McMeekin DS, et al. Phase II trial of cetuximab in the treatment of persistent or recurrent squamous or non-squamous cell carcinoma of the cervix: a Gynecologic Oncology Group study. *Gynecol Oncol*. 2011;122(3):495-500. doi:10.1016/j.ygyno.2011.05.040.
183. Wierzbicki R, Jonker DJ, Moore MJ, et al. A phase II, multicenter study of cetuximab monotherapy in patients with refractory, metastatic colorectal carcinoma with absent epidermal

growth factor receptor immunostaining. *Invest New Drugs*. 2011;29(1):167-174.  
doi:10.1007/s10637-009-9341-6.

184. Ramalingam SS, Lee J-W, Belani CP, et al. Cetuximab for the treatment of advanced bronchioloalveolar carcinoma (BAC): an Eastern Cooperative Oncology Group phase II study (ECOG 1504). *J Clin Oncol Off J Am Soc Clin Oncol*. 2011;29(13):1709-1714.  
doi:10.1200/JCO.2010.33.4094.
185. Maubec E, Petrow P, Scheer-Senjarich I, et al. Phase II study of cetuximab as first-line single-drug therapy in patients with unresectable squamous cell carcinoma of the skin. *J Clin Oncol Off J Am Soc Clin Oncol*. 2011;29(25):3419-3426. doi:10.1200/JCO.2010.34.1735.
186. Wong Y-N, Litwin S, Vaughn D, et al. Phase II trial of cetuximab with or without paclitaxel in patients with advanced urothelial tract carcinoma. *J Clin Oncol Off J Am Soc Clin Oncol*. 2012;30(28):3545-3551. doi:10.1200/JCO.2012.41.9572.
187. Neal JW, Heist RS, Fidias P, et al. Cetuximab monotherapy in patients with advanced non-small cell lung cancer after prior epidermal growth factor receptor tyrosine kinase inhibitor therapy. *J Thorac Oncol Off Publ Int Assoc Study Lung Cancer*. 2010;5(11):1855-1858.  
doi:10.1097/JTO.0b013e3181f0bee0.
188. Gold PJ, Goldman B, Iqbal S, et al. Cetuximab as second-line therapy in patients with metastatic esophageal adenocarcinoma: a phase II Southwest Oncology Group Study (S0415). *J Thorac Oncol Off Publ Int Assoc Study Lung Cancer*. 2010;5(9):1472-1476.  
doi:10.1097/JTO.0b013e3181e77a92.
189. Bradley DA, Daignault S, Ryan CJ, et al. Cilengitide (EMD 121974, NSC 707544) in asymptomatic metastatic castration resistant prostate cancer patients: a randomized phase II trial by the prostate cancer clinical trials consortium. *Invest New Drugs*. 2011;29(6):1432-1440.  
doi:10.1007/s10637-010-9420-8.
190. Manegold C, Vansteenkiste J, Cardenal F, et al. Randomized phase II study of three doses of the integrin inhibitor cilengitide versus docetaxel as second-line treatment for patients with advanced non-small-cell lung cancer. *Invest New Drugs*. 2013;31(1):175-182.  
doi:10.1007/s10637-012-9842-6.
191. Seetharamu N, Kim E, Hochster H, Martin F, Muggia F. Phase II study of liposomal cisplatin (SPI-77) in platinum-sensitive recurrences of ovarian cancer. *Anticancer Res*. 2010;30(2):541-545.
192. Reidy DL, Vakiani E, Fakih MG, et al. Randomized, phase II study of the insulin-like growth factor-1 receptor inhibitor IMC-A12, with or without cetuximab, in patients with cetuximab- or panitumumab-refractory metastatic colorectal cancer. *J Clin Oncol Off J Am Soc Clin Oncol*. 2010;28(27):4240-4246. doi:10.1200/JCO.2010.30.4154.
193. Nabhan C, Davis N, Bitran JD, et al. Efficacy and safety of clofarabine in relapsed and/or refractory non-Hodgkin lymphoma, including rituximab-refractory patients. *Cancer*. 2011;117(7):1490-1497. doi:10.1002/cncr.25603.
194. Faderl S, Garcia-Manero G, Estrov Z, et al. Oral clofarabine in the treatment of patients with higher-risk myelodysplastic syndrome. *J Clin Oncol Off J Am Soc Clin Oncol*. 2010;28(16):2755-2760. doi:10.1200/JCO.2009.26.3509.

195. Kantarjian HM, Erba HP, Claxton D, et al. Phase II study of clofarabine monotherapy in previously untreated older adults with acute myeloid leukemia and unfavorable prognostic factors. *J Clin Oncol Off J Am Soc Clin Oncol*. 2010;28(4):549-555. doi:10.1200/JCO.2009.23.3130.
196. Burnett AK, Russell NH, Kell J, et al. European development of clofarabine as treatment for older patients with acute myeloid leukemia considered unsuitable for intensive chemotherapy. *J Clin Oncol Off J Am Soc Clin Oncol*. 2010;28(14):2389-2395. doi:10.1200/JCO.2009.26.4242.
197. Lim SH, McMahan J, Zhang J, Zhang Y. A phase II study of low dose intravenous clofarabine for elderly patients with myelodysplastic syndrome who have failed 5-azacytidine. *Leuk Lymphoma*. 2010;51(12):2258-2261. doi:10.3109/10428194.2010.527404.
198. Dhani NC, Emmenegger U, Adams L, et al. Phase II study of cytarabine in men with docetaxel-refractory, castration-resistant prostate cancer with evaluation of TMPRSS2-ERG and SPINK1 as serum biomarkers. *BJU Int*. 2012;110(6):840-845. doi:10.1111/j.1464-410X.2011.10922.x.
199. García-Del-Muro X, López-Pousa A, Maurel J, et al. Randomized phase II study comparing gemcitabine plus dacarbazine versus dacarbazine alone in patients with previously treated soft tissue sarcoma: a Spanish Group for Research on Sarcomas study. *J Clin Oncol Off J Am Soc Clin Oncol*. 2011;29(18):2528-2533. doi:10.1200/JCO.2010.33.6107.
200. Ramalingam SS, Blackhall F, Krzakowski M, et al. Randomized phase II study of dacomitinib (PF-00299804), an irreversible pan-human epidermal growth factor receptor inhibitor, versus erlotinib in patients with advanced non-small-cell lung cancer. *J Clin Oncol Off J Am Soc Clin Oncol*. 2012;30(27):3337-3344. doi:10.1200/JCO.2011.40.9433.
201. Meulenbeld HJ, Bleuse JP, Vinci EM, et al. Randomized phase II study of danusertib in patients with metastatic castration-resistant prostate cancer after docetaxel failure. *BJU Int*. 2013;111(1):44-52. doi:10.1111/j.1464-410X.2012.11404.x.
202. Hosein PJ, Craig MD, Tallman MS, et al. A multicenter phase II study of darinaparsin in relapsed or refractory Hodgkin's and non-Hodgkin's lymphoma. *Am J Hematol*. 2012;87(1):111-114. doi:10.1002/ajh.22232.
203. Wu J, Henderson C, Feun L, et al. Phase II study of darinaparsin in patients with advanced hepatocellular carcinoma. *Invest New Drugs*. 2010;28(5):670-676. doi:10.1007/s10637-009-9286-9.
204. Brooks HD, Glisson BS, Bekele BN, et al. Phase 2 study of dasatinib in the treatment of head and neck squamous cell carcinoma. *Cancer*. 2011;117(10):2112-2119. doi:10.1002/cncr.25769.
205. Kluger HM, Dudek AZ, McCann C, et al. A phase 2 trial of dasatinib in advanced melanoma. *Cancer*. 2011;117(10):2202-2208. doi:10.1002/cncr.25766.
206. Mayer EL, Baurain J-F, Sparano J, et al. A phase 2 trial of dasatinib in patients with advanced HER2-positive and/or hormone receptor-positive breast cancer. *Clin Cancer Res Off J Am Assoc Cancer Res*. 2011;17(21):6897-6904. doi:10.1158/1078-0432.CCR-11-0070.
207. Amrein PC, Attar EC, Takvorian T, et al. Phase II study of dasatinib in relapsed or refractory chronic lymphocytic leukemia. *Clin Cancer Res Off J Am Assoc Cancer Res*. 2011;17(9):2977-2986. doi:10.1158/1078-0432.CCR-10-2879.



208. Kruser TJ, Traynor AM, Wheeler DL. The use of single-agent dasatinib in molecularly unselected non-small-cell lung cancer patients. *Expert Opin Investig Drugs*. 2011;20(2):305-307. doi:10.1517/13543784.2011.550873.
209. Schilder RJ, Brady WE, Lankes HA, et al. Phase II evaluation of dasatinib in the treatment of recurrent or persistent epithelial ovarian or primary peritoneal carcinoma: a Gynecologic Oncology Group study. *Gynecol Oncol*. 2012;127(1):70-74. doi:10.1016/j.ygyno.2012.06.009.
210. Sharma MR, Wroblewski K, Polite BN, et al. Dasatinib in previously treated metastatic colorectal cancer: a phase II trial of the University of Chicago Phase II Consortium. *Invest New Drugs*. 2012;30(3):1211-1215. doi:10.1007/s10637-011-9681-x.
211. Miller AA, Pang H, Hodgson L, et al. A phase II study of dasatinib in patients with chemosensitive relapsed small cell lung cancer (Cancer and Leukemia Group B 30602). *J Thorac Oncol Off Publ Int Assoc Study Lung Cancer*. 2010;5(3):380-384. doi:10.1097/JTO.0b013e3181cee36e.
212. Johnson ML, Riely GJ, Rizvi NA, et al. Phase II trial of dasatinib for patients with acquired resistance to treatment with the epidermal growth factor receptor tyrosine kinase inhibitors erlotinib or gefitinib. *J Thorac Oncol Off Publ Int Assoc Study Lung Cancer*. 2011;6(6):1128-1131. doi:10.1097/JTO.0b013e3182161508.
213. Dudek AZ, Pang H, Kratzke RA, et al. Phase II study of dasatinib in patients with previously treated malignant mesothelioma (cancer and leukemia group B 30601): a brief report. *J Thorac Oncol Off Publ Int Assoc Study Lung Cancer*. 2012;7(4):755-759. doi:10.1097/JTO.0b013e318248242c.
214. Yu EY, Massard C, Gross ME, et al. Once-daily dasatinib: expansion of phase II study evaluating safety and efficacy of dasatinib in patients with metastatic castration-resistant prostate cancer. *Urology*. 2011;77(5):1166-1171. doi:10.1016/j.urology.2011.01.006.
215. Braun T, Itzykson R, Renneville A, et al. Molecular predictors of response to decitabine in advanced chronic myelomonocytic leukemia: a phase 2 trial. *Blood*. 2011;118(14):3824-3831. doi:10.1182/blood-2011-05-352039.
216. Lübbert M, Rüter BH, Claus R, et al. A multicenter phase II trial of decitabine as first-line treatment for older patients with acute myeloid leukemia judged unfit for induction chemotherapy. *Haematologica*. 2012;97(3):393-401. doi:10.3324/haematol.2011.048231.
217. Cashen AF, Schiller GJ, O'Donnell MR, DiPersio JF. Multicenter, phase II study of decitabine for the first-line treatment of older patients with acute myeloid leukemia. *J Clin Oncol Off J Am Soc Clin Oncol*. 2010;28(4):556-561. doi:10.1200/JCO.2009.23.9178.
218. Blum W, Garzon R, Klisovic RB, et al. Clinical response and miR-29b predictive significance in older AML patients treated with a 10-day schedule of decitabine. *Proc Natl Acad Sci U S A*. 2010;107(16):7473-7478. doi:10.1073/pnas.1002650107.
219. Telang S, Rasku MA, Clem AL, et al. Phase II trial of the regulatory T cell-depleting agent, denileukin diftitox, in patients with unresectable stage IV melanoma. *BMC Cancer*. 2011;11:515. doi:10.1186/1471-2407-11-515.

220. Specenier P, Rasschaert M, Vroman P, et al. Weekly docetaxel in patients with recurrent and/or metastatic squamous cell carcinoma of the head and neck. *Am J Clin Oncol*. 2011;34(5):472-477. doi:10.1097/COC.0b013e3181ec5f16.
221. Mezynski J, Pezaro C, Bianchini D, et al. Antitumour activity of docetaxel following treatment with the CYP17A1 inhibitor abiraterone: clinical evidence for cross-resistance? *Ann Oncol Off J Eur Soc Med Oncol ESMO*. 2012;23(11):2943-2947. doi:10.1093/annonc/mds119.
222. Di Lorenzo G, Buonerba C, Faiella A, et al. Phase II study of docetaxel re-treatment in docetaxel-pretreated castration-resistant prostate cancer. *BJU Int*. 2011;107(2):234-239. doi:10.1111/j.1464-410X.2010.09498.x.
223. Dranitsaris G, Coleman R, Gradishar W. nab-Paclitaxel weekly or every 3 weeks compared to standard docetaxel as first-line therapy in patients with metastatic breast cancer: an economic analysis of a prospective randomized trial. *Breast Cancer Res Treat*. 2010;119(3):717-724. doi:10.1007/s10549-009-0424-z.
224. Ning X, Sun Z, Wang Y, et al. Docetaxel plus trans-tracheal injection of adenoviral-mediated p53 versus docetaxel alone in patients with previously treated non-small-cell lung cancer. *Cancer Gene Ther*. 2011;18(6):444-449. doi:10.1038/cgt.2011.15.
225. Beuselink B, Wildiers H, Wynendaele W, Dirix L, Kains J-P, Paridaens R. Weekly paclitaxel versus weekly docetaxel in elderly or frail patients with metastatic breast carcinoma: a randomized phase-II study of the Belgian Society of Medical Oncology. *Crit Rev Oncol Hematol*. 2010;75(1):70-77. doi:10.1016/j.critrevonc.2009.07.001.
226. Belvedere O, Follador A, Rossetto C, et al. A randomised phase II study of docetaxel/oxaliplatin and docetaxel in patients with previously treated non-small cell lung cancer: an Alpe-Adria Thoracic Oncology Multidisciplinary group trial (ATOM 019). *Eur J Cancer Oxf Engl 1990*. 2011;47(11):1653-1659. doi:10.1016/j.ejca.2011.03.020.
227. Meulenbeld HJ, van Werkhoven ED, Coenen JLLM, et al. Randomised phase II/III study of docetaxel with or without risedronate in patients with metastatic Castration Resistant Prostate Cancer (CRPC), the Netherlands Prostate Study (NePro). *Eur J Cancer Oxf Engl 1990*. 2012;48(16):2993-3000. doi:10.1016/j.ejca.2012.05.014.
228. Rugo HS, Stopeck AT, Joy AA, et al. Randomized, placebo-controlled, double-blind, phase II study of axitinib plus docetaxel versus docetaxel plus placebo in patients with metastatic breast cancer. *J Clin Oncol Off J Am Soc Clin Oncol*. 2011;29(18):2459-2465. doi:10.1200/JCO.2010.31.2975.
229. Choueiri TK, Ross RW, Jacobus S, et al. Double-blind, randomized trial of docetaxel plus vandetanib versus docetaxel plus placebo in platinum-pretreated metastatic urothelial cancer. *J Clin Oncol Off J Am Soc Clin Oncol*. 2012;30(5):507-512. doi:10.1200/JCO.2011.37.7002.
230. Morère J-F, Bréchet J-M, Westeel V, et al. Randomized phase II trial of gefitinib or gemcitabine or docetaxel chemotherapy in patients with advanced non-small-cell lung cancer and a performance status of 2 or 3 (IFCT-0301 study). *Lung Cancer Amst Neth*. 2010;70(3):301-307. doi:10.1016/j.lungcan.2010.03.003.
231. Kim KB, Chesney J, Robinson D, Gardner H, Shi MM, Kirkwood JM. Phase I/II and pharmacodynamic study of dovitinib (TKI258), an inhibitor of fibroblast growth factor receptors

and VEGF receptors, in patients with advanced melanoma. *Clin Cancer Res Off J Am Assoc Cancer Res*. 2011;17(23):7451-7461. doi:10.1158/1078-0432.CCR-11-1747.

232. Valle JW, Armstrong A, Newman C, et al. A phase 2 study of SP1049C, doxorubicin in P-glycoprotein-targeting pluronics, in patients with advanced adenocarcinoma of the esophagus and gastroesophageal junction. *Invest New Drugs*. 2011;29(5):1029-1037. doi:10.1007/s10637-010-9399-1.
233. Di Legge A, Trivellizzi IN, Moruzzi MC, Pesce A, Scambia G, Lorusso D. Phase 2 trial of nonpegylated doxorubicin (Myocet) as second-line treatment in advanced or recurrent endometrial cancer. *Int J Gynecol Cancer Off J Int Gynecol Cancer Soc*. 2011;21(8):1446-1451. doi:10.1097/IGC.0b013e31822d754e.
234. Fiegl M, Mlineritsch B, Hubalek M, Bartsch R, Pluschnig U, Steger GG. Single-agent pegylated liposomal doxorubicin (PLD) in the treatment of metastatic breast cancer: results of an Austrian observational trial. *BMC Cancer*. 2011;11:373. doi:10.1186/1471-2407-11-373.
235. Pignata S, Amant F, Scambia G, et al. A phase I-II study of elacytarabine (CP-4055) in the treatment of patients with ovarian cancer resistant or refractory to platinum therapy. *Cancer Chemother Pharmacol*. 2011;68(5):1347-1353. doi:10.1007/s00280-011-1735-4.
236. Matulonis UA, Lee J, Lasonde B, et al. ENMD-2076, an oral inhibitor of angiogenic and proliferation kinases, has activity in recurrent, platinum resistant ovarian cancer. *Eur J Cancer Oxf Engl 1990*. 2013;49(1):121-131. doi:10.1016/j.ejca.2012.07.020.
237. Glimelius B, Lahn M, Gawande S, et al. A window of opportunity phase II study of enzastaurin in chemo-naïve patients with asymptomatic metastatic colorectal cancer. *Ann Oncol Off J Eur Soc Med Oncol ESMO*. 2010;21(5):1020-1026. doi:10.1093/annonc/mdp521.
238. Usha L, Sill MW, Darcy KM, et al. A Gynecologic Oncology Group phase II trial of the protein kinase C-beta inhibitor, enzastaurin and evaluation of markers with potential predictive and prognostic value in persistent or recurrent epithelial ovarian and primary peritoneal malignancies. *Gynecol Oncol*. 2011;121(3):455-461. doi:10.1016/j.ygyno.2011.02.013.
239. Dreicer R, Garcia J, Hussain M, et al. Oral enzastaurin in prostate cancer: a two-cohort phase II trial in patients with PSA progression in the non-metastatic castrate state and following docetaxel-based chemotherapy for castrate metastatic disease. *Invest New Drugs*. 2011;29(6):1441-1448. doi:10.1007/s10637-010-9428-0.
240. Kreisl TN, Kotliarova S, Butman JA, et al. A phase I/II trial of enzastaurin in patients with recurrent high-grade gliomas. *Neuro-Oncol*. 2010;12(2):181-189. doi:10.1093/neuonc/nop042.
241. De Bono JS, Molife LR, Sonpavde G, et al. Phase II study of eribulin mesylate (E7389) in patients with metastatic castration-resistant prostate cancer stratified by prior taxane therapy. *Ann Oncol Off J Eur Soc Med Oncol ESMO*. 2012;23(5):1241-1249. doi:10.1093/annonc/mdr380.
242. Aogi K, Iwata H, Masuda N, et al. A phase II study of eribulin in Japanese patients with heavily pretreated metastatic breast cancer. *Ann Oncol Off J Eur Soc Med Oncol ESMO*. 2012;23(6):1441-1448. doi:10.1093/annonc/mdr444.
243. Arnold SM, Moon J, Williamson SK, et al. Phase II evaluation of eribulin mesylate (E7389, NSC 707389) in patients with metastatic or recurrent squamous cell carcinoma of the head and neck:

Southwest Oncology Group trial S0618. *Invest New Drugs*. 2011;29(2):352-359. doi:10.1007/s10637-009-9348-z.

244. Renouf DJ, Tang PA, Major P, et al. A phase II study of the halichondrin B analog eribulin mesylate in gemcitabine refractory advanced pancreatic cancer. *Invest New Drugs*. 2012;30(3):1203-1207. doi:10.1007/s10637-011-9673-x.
245. Cortes J, Vahdat L, Blum JL, et al. Phase II study of the halichondrin B analog eribulin mesylate in patients with locally advanced or metastatic breast cancer previously treated with an anthracycline, a taxane, and capecitabine. *J Clin Oncol Off J Am Soc Clin Oncol*. 2010;28(25):3922-3928. doi:10.1200/JCO.2009.25.8467.
246. Gitlitz BJ, Tsao-Wei DD, Groshen S, et al. A phase II study of halichondrin B analog eribulin mesylate (E7389) in patients with advanced non-small cell lung cancer previously treated with a taxane: a California cancer consortium trial. *J Thorac Oncol Off Publ Int Assoc Study Lung Cancer*. 2012;7(3):574-578. doi:10.1097/JTO.0b013e31823f43ca.
247. Schöffski P, Ray-Coquard IL, Cioffi A, et al. Activity of eribulin mesylate in patients with soft-tissue sarcoma: a phase 2 study in four independent histological subtypes. *Lancet Oncol*. 2011;12(11):1045-1052. doi:10.1016/S1470-2045(11)70230-3.
248. Tan E-H, Ramlau R, Pluzanska A, et al. A multicentre phase II gene expression profiling study of putative relationships between tumour biomarkers and clinical response with erlotinib in non-small-cell lung cancer. *Ann Oncol Off J Eur Soc Med Oncol ESMO*. 2010;21(2):217-222. doi:10.1093/annonc/mdp520.
249. Kobayashi T, Koizumi T, Agatsuma T, et al. A phase II trial of erlotinib in patients with EGFR wild-type advanced non-small-cell lung cancer. *Cancer Chemother Pharmacol*. 2012;69(5):1241-1246. doi:10.1007/s00280-012-1831-0.
250. Spigel DR, Burris HA, Greco FA, et al. Randomized, double-blind, placebo-controlled, phase II trial of sorafenib and erlotinib or erlotinib alone in previously treated advanced non-small-cell lung cancer. *J Clin Oncol Off J Am Soc Clin Oncol*. 2011;29(18):2582-2589. doi:10.1200/JCO.2010.30.7678.
251. Hirsch FR, Kabbinar F, Eisen T, et al. A randomized, phase II, biomarker-selected study comparing erlotinib to erlotinib intercalated with chemotherapy in first-line therapy for advanced non-small-cell lung cancer. *J Clin Oncol Off J Am Soc Clin Oncol*. 2011;29(26):3567-3573. doi:10.1200/JCO.2010.34.4929.
252. Witta SE, Jotte RM, Konduri K, et al. Randomized phase II trial of erlotinib with and without entinostat in patients with advanced non-small-cell lung cancer who progressed on prior chemotherapy. *J Clin Oncol Off J Am Soc Clin Oncol*. 2012;30(18):2248-2255. doi:10.1200/JCO.2011.38.9411.
253. Yoshioka H, Hotta K, Kiura K, et al. A phase II trial of erlotinib monotherapy in pretreated patients with advanced non-small cell lung cancer who do not possess active EGFR mutations: Okayama Lung Cancer Study Group trial 0705. *J Thorac Oncol Off Publ Int Assoc Study Lung Cancer*. 2010;5(1):99-104. doi:10.1097/JTO.0b013e3181c20063.
254. Stinchcombe TE, Peterman AH, Lee CB, et al. A randomized phase II trial of first-line treatment with gemcitabine, erlotinib, or gemcitabine and erlotinib in elderly patients (age  $\geq 70$  years) with

stage IIIB/IV non-small cell lung cancer. *J Thorac Oncol Off Publ Int Assoc Study Lung Cancer*. 2011;6(9):1569-1577. doi:10.1097/JTO.0b013e3182210430.

255. Kelly K, Azzoli CG, Zatloukal P, et al. Randomized phase 2b study of pralatrexate versus erlotinib in patients with stage IIIB/IV non-small-cell lung cancer (NSCLC) after failure of prior platinum-based therapy. *J Thorac Oncol Off Publ Int Assoc Study Lung Cancer*. 2012;7(6):1041-1048. doi:10.1097/JTO.0b013e31824cc66c.
256. Chen Y-M, Tsai C-M, Fan W-C, et al. Phase II randomized trial of erlotinib or vinorelbine in chemo-naïve, advanced, non-small cell lung cancer patients aged 70 years or older. *J Thorac Oncol Off Publ Int Assoc Study Lung Cancer*. 2012;7(2):412-418. doi:10.1097/JTO.0b013e31823a39e8.
257. Matsuura S, Inui N, Ozawa Y, et al. Phase II study of erlotinib as third-line monotherapy in patients with advanced non-small-cell lung cancer without epidermal growth factor receptor mutations. *Jpn J Clin Oncol*. 2011;41(8):959-963. doi:10.1093/jjco/hyr079.
258. Raizer JJ, Abrey LE, Lassman AB, et al. A phase II trial of erlotinib in patients with recurrent malignant gliomas and nonprogressive glioblastoma multiforme post radiation therapy. *Neuro-Oncol*. 2010;12(1):95-103. doi:10.1093/neuonc/nop015.
259. Yung WKA, Vredenburgh JJ, Cloughesy TF, et al. Safety and efficacy of erlotinib in first-relapse glioblastoma: a phase II open-label study. *Neuro-Oncol*. 2010;12(10):1061-1070. doi:10.1093/neuonc/noq072.
260. Rossi D, Dennetta D, Ugolini M, et al. Activity and safety of erlotinib as second- and third-line treatment in elderly patients with advanced non-small cell lung cancer: a phase II trial. *Target Oncol*. 2010;5(4):231-235. doi:10.1007/s11523-010-0163-4.
261. Kim ES, Herbst RS, Wistuba II, et al. The BATTLE trial: personalizing therapy for lung cancer. *Cancer Discov*. 2011;1(1):44-53. doi:10.1158/2159-8274.CD-10-0010.
262. Noguchi M, Kakuma T, Uemura H, et al. A randomized phase II trial of personalized peptide vaccine plus low dose estramustine phosphate (EMP) versus standard dose EMP in patients with castration resistant prostate cancer. *Cancer Immunol Immunother Cll*. 2010;59(7):1001-1009. doi:10.1007/s00262-010-0822-4.
263. Hersey P, Sosman J, O'Day S, et al. A randomized phase 2 study of etaracizumab, a monoclonal antibody against integrin alpha(v)beta(3), + or - dacarbazine in patients with stage IV metastatic melanoma. *Cancer*. 2010;116(6):1526-1534. doi:10.1002/cncr.24821.
264. Johnston PB, Inwards DJ, Colgan JP, et al. A Phase II trial of the oral mTOR inhibitor everolimus in relapsed Hodgkin lymphoma. *Am J Hematol*. 2010;85(5):320-324. doi:10.1002/ajh.21664.
265. Yoon DH, Ryu M-H, Park YS, et al. Phase II study of everolimus with biomarker exploration in patients with advanced gastric cancer refractory to chemotherapy including fluoropyrimidine and platinum. *Br J Cancer*. 2012;106(6):1039-1044. doi:10.1038/bjc.2012.47.
266. Slomovitz BM, Lu KH, Johnston T, et al. A phase 2 study of the oral mammalian target of rapamycin inhibitor, everolimus, in patients with recurrent endometrial carcinoma. *Cancer*. 2010;116(23):5415-5419. doi:10.1002/cncr.25515.

267. Zent CS, LaPlant BR, Johnston PB, et al. The treatment of recurrent/refractory chronic lymphocytic leukemia/small lymphocytic lymphoma (CLL) with everolimus results in clinical responses and mobilization of CLL cells into the circulation. *Cancer*. 2010;116(9):2201-2207. doi:10.1002/cncr.25005.
268. Zhu AX, Abrams TA, Miksad R, et al. Phase 1/2 study of everolimus in advanced hepatocellular carcinoma. *Cancer*. 2011;117(22):5094-5102. doi:10.1002/cncr.26165.
269. Oh D-Y, Kim T-W, Park YS, et al. Phase 2 study of everolimus monotherapy in patients with nonfunctioning neuroendocrine tumors or pheochromocytomas/paragangliomas. *Cancer*. 2012;118(24):6162-6170. doi:10.1002/cncr.27675.
270. Tarhini A, Kotsakis A, Gooding W, et al. Phase II study of everolimus (RAD001) in previously treated small cell lung cancer. *Clin Cancer Res Off J Am Assoc Cancer Res*. 2010;16(23):5900-5907. doi:10.1158/1078-0432.CCR-10-0802.
271. Doi T, Muro K, Boku N, et al. Multicenter phase II study of everolimus in patients with previously treated metastatic gastric cancer. *J Clin Oncol Off J Am Soc Clin Oncol*. 2010;28(11):1904-1910. doi:10.1200/JCO.2009.26.2923.
272. Yao JC, Lombard-Bohas C, Baudin E, et al. Daily oral everolimus activity in patients with metastatic pancreatic neuroendocrine tumors after failure of cytotoxic chemotherapy: a phase II trial. *J Clin Oncol Off J Am Soc Clin Oncol*. 2010;28(1):69-76. doi:10.1200/JCO.2009.24.2669.
273. Ghobrial IM, Gertz M, Laplant B, et al. Phase II trial of the oral mammalian target of rapamycin inhibitor everolimus in relapsed or refractory Waldenstrom macroglobulinemia. *J Clin Oncol Off J Am Soc Clin Oncol*. 2010;28(8):1408-1414. doi:10.1200/JCO.2009.24.0994.
274. Parikh SA, Kantarjian HM, Richie MA, Cortes JE, Verstovsek S. Experience with everolimus (RAD001), an oral mammalian target of rapamycin inhibitor, in patients with systemic mastocytosis. *Leuk Lymphoma*. 2010;51(2):269-274. doi:10.3109/10428190903486220.
275. Witzig TE, Reeder CB, LaPlant BR, et al. A phase II trial of the oral mTOR inhibitor everolimus in relapsed aggressive lymphoma. *Leukemia*. 2011;25(2):341-347. doi:10.1038/leu.2010.226.
276. Raza A, Galili N, Smith SE, et al. A phase 2 randomized multicenter study of 2 extended dosing schedules of oral ezatiostat in low to intermediate-1 risk myelodysplastic syndrome. *Cancer*. 2012;118(8):2138-2147. doi:10.1002/cncr.26469.
277. Friedberg JW, Sharman J, Sweetenham J, et al. Inhibition of Syk with fostamatinib disodium has significant clinical activity in non-Hodgkin lymphoma and chronic lymphocytic leukemia. *Blood*. 2010;115(13):2578-2585. doi:10.1182/blood-2009-08-236471.
278. Fabi A, Metro G, Vidiri A, et al. Low-dose fotemustine for recurrent malignant glioma: a multicenter phase II study. *J Neurooncol*. 2010;100(2):209-215. doi:10.1007/s11060-010-0163-3.
279. Kobayashi M, Matsui K, Katakami N, et al. Phase II study of gefitinib as a first-line therapy in elderly patients with pulmonary adenocarcinoma: West Japan Thoracic Oncology Group Study 0402. *Jpn J Clin Oncol*. 2011;41(8):948-952. doi:10.1093/jjco/hyr087.
280. Norden AD, Raizer JJ, Abrey LE, et al. Phase II trials of erlotinib or gefitinib in patients with recurrent meningioma. *J Neurooncol*. 2010;96(2):211-217. doi:10.1007/s11060-009-9948-7.

281. Petrylak DP, Tangen CM, Van Veldhuizen PJ Jr, et al. Results of the Southwest Oncology Group phase II evaluation (study S0031) of ZD1839 for advanced transitional cell carcinoma of the urothelium. *BJU Int*. 2010;105(3):317-321. doi:10.1111/j.1464-410X.2009.08799.x.
282. Grossi F, Rijavec E, Dal Bello MG, et al. The administration of gefitinib in patients with advanced non-small-cell lung cancer after the failure of erlotinib. *Cancer Chemother Pharmacol*. 2012;69(6):1407-1412. doi:10.1007/s00280-012-1848-4.
283. Gutteridge E, Agrawal A, Nicholson R, Leung Cheung K, Robertson J, Gee J. The effects of gefitinib in tamoxifen-resistant and hormone-insensitive breast cancer: a phase II study. *Int J Cancer J Int Cancer*. 2010;126(8):1806-1816. doi:10.1002/ijc.24884.
284. Uhm JH, Ballman KV, Wu W, et al. Phase II evaluation of gefitinib in patients with newly diagnosed Grade 4 astrocytoma: Mayo/North Central Cancer Treatment Group Study N0074. *Int J Radiat Oncol Biol Phys*. 2011;80(2):347-353. doi:10.1016/j.ijrobp.2010.01.070.
285. Patel SP, Kim KB, Papadopoulos NE, et al. A phase II study of gefitinib in patients with metastatic melanoma. *Melanoma Res*. 2011;21(4):357-363. doi:10.1097/CMR.0b013e3283471073.
286. Asahina H, Oizumi S, Inoue A, et al. Phase II study of gefitinib readministration in patients with advanced non-small cell lung cancer and previous response to gefitinib. *Oncology*. 2010;79(5-6):423-429. doi:10.1159/000326488.
287. Lühr JM, Haas SL, Bechstein W-O, et al. Cationic liposomal paclitaxel plus gemcitabine or gemcitabine alone in patients with advanced pancreatic cancer: a randomized controlled phase II trial. *Ann Oncol Off J Eur Soc Med Oncol ESMO*. 2012;23(5):1214-1222. doi:10.1093/annonc/mdr379.
288. Okusaka T, Nakachi K, Fukutomi A, et al. Gemcitabine alone or in combination with cisplatin in patients with biliary tract cancer: a comparative multicentre study in Japan. *Br J Cancer*. 2010;103(4):469-474. doi:10.1038/sj.bjc.6605779.
289. Nakai Y, Isayama H, Sasaki T, et al. A multicentre randomised phase II trial of gemcitabine alone vs gemcitabine and S-1 combination therapy in advanced pancreatic cancer: GEMSAP study. *Br J Cancer*. 2012;106(12):1934-1939. doi:10.1038/bjc.2012.183.
290. Takao S, Tokuda Y, Saeki T, Funai J, Ishii M, Takashima S. Long-term gemcitabine administration in heavily pretreated Japanese patients with metastatic breast cancer: additional safety analysis of a phase II study. *Breast Cancer Tokyo Jpn*. 2012;19(4):335-342. doi:10.1007/s12282-011-0289-y.
291. Ozaka M, Matsumura Y, Ishii H, et al. Randomized phase II study of gemcitabine and S-1 combination versus gemcitabine alone in the treatment of unresectable advanced pancreatic cancer (Japan Clinical Cancer Research Organization PC-01 study). *Cancer Chemother Pharmacol*. 2012;69(5):1197-1204. doi:10.1007/s00280-012-1822-1.
292. Maraveyas A, Waters J, Roy R, et al. Gemcitabine versus gemcitabine plus dalteparin thromboprophylaxis in pancreatic cancer. *Eur J Cancer Oxf Engl 1990*. 2012;48(9):1283-1292. doi:10.1016/j.ejca.2011.10.017.
293. Culine S, Fléchon A, Guillot A, et al. Gemcitabine or gemcitabine plus oxaliplatin in the first-line treatment of patients with advanced transitional cell carcinoma of the urothelium unfit for

cisplatin-based chemotherapy: a randomized phase 2 study of the French Genitourinary Tumor Group (GETUG V01). *Eur Urol.* 2011;60(6):1251-1257. doi:10.1016/j.eururo.2011.08.072.

294. Tait DL, Blessing JA, Hoffman JS, et al. A phase II study of gemcitabine (gemzar, LY188011) in the treatment of recurrent or persistent endometrial carcinoma: a gynecologic oncology group study. *Gynecol Oncol.* 2011;121(1):118-121. doi:10.1016/j.ygyno.2010.11.027.
295. Oh SY, Kim WS, Lee DH, et al. Phase II study of gemcitabine for treatment of patients with advanced stage marginal zone B-cell lymphoma: Consortium for Improving Survival of Lymphoma (CISL) trial. *Invest New Drugs.* 2010;28(2):171-177. doi:10.1007/s10637-009-9260-6.
296. Richards DA, Kuefler PR, Becerra C, et al. Gemcitabine plus enzastaurin or single-agent gemcitabine in locally advanced or metastatic pancreatic cancer: results of a phase II, randomized, noncomparative study. *Invest New Drugs.* 2011;29(1):144-153. doi:10.1007/s10637-009-9307-8.
297. Oh SY, Jeong CY, Hong SC, et al. Phase II study of second line gemcitabine single chemotherapy for biliary tract cancer patients with 5-fluorouracil refractoriness. *Invest New Drugs.* 2011;29(5):1066-1072. doi:10.1007/s10637-010-9417-3.
298. Kusagaya H, Inui N, Karayama M, et al. Biweekly combination therapy with gemcitabine and carboplatin compared with gemcitabine monotherapy in elderly patients with advanced non-small-cell lung cancer: a randomized, phase-II study. *Lung Cancer Amst Neth.* 2012;77(3):550-555. doi:10.1016/j.lungcan.2012.05.106.
299. Conroy T, Desseigne F, Ychou M, et al. FOLFIRINOX versus gemcitabine for metastatic pancreatic cancer. *N Engl J Med.* 2011;364(19):1817-1825. doi:10.1056/NEJMoa1011923.
300. Michael M, Pavlakis N, Clingan P, De Boer R, Johnston M, Clarke S. A multi-centre randomized, open-label phase II trial of continuous erlotinib plus gemcitabine or gemcitabine as first-line therapy in ECOG PS2 patients with advanced non-small cell lung cancer. *Oncol Rep.* 2012;28(3):763-767. doi:10.3892/or.2012.1871.
301. Milella M, Gelibter AJ, Pino MS, et al. Fixed-dose-rate gemcitabine: a viable first-line treatment option for advanced pancreatic and biliary tract cancer. *The oncologist.* 2010;15(2):e1-e4. doi:10.1634/theoncologist.2008-0135.
302. Pautier P, Floquet A, Penel N, et al. Randomized multicenter and stratified phase II study of gemcitabine alone versus gemcitabine and docetaxel in patients with metastatic or relapsed leiomyosarcomas: a Federation Nationale des Centres de Lutte Contre le Cancer (FNCLCC) French Sarcoma Group Study (TAXOGEM study). *The oncologist.* 2012;17(9):1213-1220. doi:10.1634/theoncologist.2011-0467.
303. Pecorelli S, Ray-Coquard I, Tredan O, et al. Phase II of oral gimatecan in patients with recurrent epithelial ovarian, fallopian tube or peritoneal cancer, previously treated with platinum and taxanes. *Ann Oncol Off J Eur Soc Med Oncol ESMO.* 2010;21(4):759-765. doi:10.1093/annonc/mdp514.
304. Roche MR, Rudd PJ, Krasner CN, et al. Phase II trial of GM-CSF in women with asymptomatic recurrent müllerian tumors. *Gynecol Oncol.* 2010;116(2):168-172. doi:10.1016/j.ygyno.2009.10.075.



305. Baggstrom MQ, Qi Y, Koczywas M, et al. A phase II study of AT-101 (Gossypol) in chemotherapy-sensitive recurrent extensive-stage small cell lung cancer. *J Thorac Oncol Off Publ Int Assoc Study Lung Cancer*. 2011;6(10):1757-1760. doi:10.1097/JTO.0b013e31822e2941.
306. Couldwell WT, Surnock AA, Tobia AJ, et al. A phase 1/2 study of orally administered synthetic hypericin for treatment of recurrent malignant gliomas. *Cancer*. 2011;117(21):4905-4915. doi:10.1002/cncr.26123.
307. Penel N, Le Cesne A, Bui BN, et al. Imatinib for progressive and recurrent aggressive fibromatosis (desmoid tumors): an FNCLCC/French Sarcoma Group phase II trial with a long-term follow-up. *Ann Oncol Off J Eur Soc Med Oncol ESMO*. 2011;22(2):452-457. doi:10.1093/annonc/mdq341.
308. Palmieri G, Marino M, Buonerba C, et al. Imatinib mesylate in thymic epithelial malignancies. *Cancer Chemother Pharmacol*. 2012;69(2):309-315. doi:10.1007/s00280-011-1690-0.
309. Chugh R, Wathen JK, Patel SR, et al. Efficacy of imatinib in aggressive fibromatosis: Results of a phase II multicenter Sarcoma Alliance for Research through Collaboration (SARC) trial. *Clin Cancer Res Off J Am Assoc Cancer Res*. 2010;16(19):4884-4891. doi:10.1158/1078-0432.CCR-10-1177.
310. Sugiura H, Fujiwara Y, Ando M, et al. Multicenter phase II trial assessing effectiveness of imatinib mesylate on relapsed or refractory KIT-positive or PDGFR-positive sarcoma. *J Orthop Sci Off J Jpn Orthop Assoc*. 2010;15(5):654-660. doi:10.1007/s00776-010-1506-9.
311. Roth A, Schleyer E, Schoppmeyer K, et al. Imatinib mesylate for palliative second-line treatment of advanced biliary tract cancer: a bicentric phase II study. *Onkologie*. 2011;34(8-9):469-470. doi:10.1159/000331065.
312. Moehler TM, Feneberg R, Ho AD, et al. Combined phase I/II study of imexon (AOP99.0001) for treatment of relapsed or refractory multiple myeloma. *Anticancer Drugs*. 2010;21(7):708-715. doi:10.1097/CAD.0b013e32833b975b.
313. Ng CS, Wang X, Faria SC, Lin E, Charnsangavej C, Tannir NM. Perfusion CT in patients with metastatic renal cell carcinoma treated with interferon. *AJR Am J Roentgenol*. 2010;194(1):166-171. doi:10.2214/AJR.09.3105.
314. Borden EC, Jacobs B, Hollovar E, et al. Gene regulatory and clinical effects of interferon  $\beta$  in patients with metastatic melanoma: a phase II trial. *J Interferon Cytokine Res Off J Int Soc Interferon Cytokine Res*. 2011;31(5):433-440. doi:10.1089/jir.2010.0054.
315. Wiernik PH, Dutcher JP, Yao X, et al. Phase II study of interleukin-4 in indolent B-cell non-Hodgkin lymphoma and B-cell chronic lymphocytic leukemia: a study of the Eastern Cooperative Oncology Group (E5Y92). *J Immunother Hagerstown Md 1997*. 2010;33(9):1006-1009. doi:10.1097/CJI.0b013e3181f5dfc5.
316. O'Day S, Pavlick A, Loquai C, et al. A randomised, phase II study of intetumumab, an anti- $\alpha$ v-integrin mAb, alone and with dacarbazine in stage IV melanoma. *Br J Cancer*. 2011;105(3):346-352. doi:10.1038/bjc.2011.183.

317. O'Day SJ, Maio M, Chiarion-Sileni V, et al. Efficacy and safety of ipilimumab monotherapy in patients with pretreated advanced melanoma: a multicenter single-arm phase II study. *Ann Oncol Off J Eur Soc Med Oncol ESMO*. 2010;21(8):1712-1717. doi:10.1093/annonc/mdq013.
318. Wolchok JD, Weber JS, Hamid O, et al. Ipilimumab efficacy and safety in patients with advanced melanoma: a retrospective analysis of HLA subtype from four trials. *Cancer Immun*. 2010;10:9.
319. Hersh EM, O'Day SJ, Powderly J, et al. A phase II multicenter study of ipilimumab with or without dacarbazine in chemotherapy-naïve patients with advanced melanoma. *Invest New Drugs*. 2011;29(3):489-498. doi:10.1007/s10637-009-9376-8.
320. Royal RE, Levy C, Turner K, et al. Phase 2 trial of single agent Ipilimumab (anti-CTLA-4) for locally advanced or metastatic pancreatic adenocarcinoma. *J Immunother Hagerstown Md* 1997. 2010;33(8):828-833. doi:10.1097/CJI.0b013e3181eec14c.
321. Hamid O, Schmidt H, Nissan A, et al. A prospective phase II trial exploring the association between tumor microenvironment biomarkers and clinical activity of ipilimumab in advanced melanoma. *J Transl Med*. 2011;9:204. doi:10.1186/1479-5876-9-204.
322. Wolchok JD, Neyns B, Linette G, et al. Ipilimumab monotherapy in patients with pretreated advanced melanoma: a randomised, double-blind, multicentre, phase 2, dose-ranging study. *Lancet Oncol*. 2010;11(2):155-164. doi:10.1016/S1470-2045(09)70334-1.
323. Sym SJ, Hong J, Park J, et al. A randomized phase II study of biweekly irinotecan monotherapy or a combination of irinotecan plus 5-fluorouracil/leucovorin (mFOLFIRI) in patients with metastatic gastric adenocarcinoma refractory to or progressive after first-line chemotherapy. *Cancer Chemother Pharmacol*. 2013;71(2):481-488. doi:10.1007/s00280-012-2027-3.
324. Clarke SJ, Yip S, Brown C, et al. Single-agent irinotecan or FOLFIRI as second-line chemotherapy for advanced colorectal cancer; results of a randomised phase II study (DaVINCI) and meta-analysis [corrected]. *Eur J Cancer Oxf Engl* 1990. 2011;47(12):1826-1836. doi:10.1016/j.ejca.2011.04.024.
325. Matsubara N, Maemondo M, Inoue A, et al. Phase II study of irinotecan as a third- or fourth-line treatment for advanced non-small cell lung cancer: NJLCG0703. *Respir Investig*. 2013;51(1):28-34. doi:10.1016/j.resinv.2012.09.004.
326. Schilder RJ, Blessing JA, Shahin MS, et al. A phase 2 evaluation of irifulven as second-line treatment of recurrent or persistent intermediately platinum-sensitive ovarian or primary peritoneal cancer: a Gynecologic Oncology Group trial. *Int J Gynecol Cancer Off J Int Gynecol Cancer Soc*. 2010;20(7):1137-1141.
327. Kim YH, Muro K, Yasui H, et al. A phase II trial of ixabepilone in Asian patients with advanced gastric cancer previously treated with fluoropyrimidine-based chemotherapy. *Cancer Chemother Pharmacol*. 2012;70(4):583-590. doi:10.1007/s00280-012-1943-6.
328. Huang H, Menefee M, Edgerly M, et al. A phase II clinical trial of ixabepilone (Ixempra; BMS-247550; NSC 710428), an epothilone B analog, in patients with metastatic renal cell carcinoma. *Clin Cancer Res Off J Am Assoc Cancer Res*. 2010;16(5):1634-1641. doi:10.1158/1078-0432.CCR-09-0379.

329. Liu G, Chen Y-H, Dipaola R, Carducci M, Wilding G. Phase II trial of weekly ixabepilone in men with metastatic castrate-resistant prostate cancer (E3803): a trial of the Eastern Cooperative Oncology Group. *Clin Genitourin Cancer*. 2012;10(2):99-105. doi:10.1016/j.clgc.2012.01.009.
330. Nimeiri HS, Singh DA, Kasza K, et al. The epothilone B analogue ixabepilone in patients with advanced hepatobiliary cancers: a trial of the University of Chicago Phase II Consortium. *Invest New Drugs*. 2010;28(6):854-858. doi:10.1007/s10637-009-9297-6.
331. Peereboom DM, Supko JG, Carson KA, et al. A phase I/II trial and pharmacokinetic study of ixabepilone in adult patients with recurrent high-grade gliomas. *J Neurooncol*. 2010;100(2):261-268. doi:10.1007/s11060-010-0190-0.
332. Ott PA, Hamilton A, Jones A, et al. A phase II trial of the epothilone B analog ixabepilone (BMS-247550) in patients with metastatic melanoma. *PLoS One*. 2010;5(1):e8714. doi:10.1371/journal.pone.0008714.
333. Procopio G, Guadalupi V, Giganti MO, et al. Low dose of ketoconazole in patients with prostate adenocarcinoma resistant to pharmacological castration. *BJU Int*. 2011;108(2):223-227. doi:10.1111/j.1464-410X.2010.09825.x.
334. Spitaleri G, Berardi R, Pierantoni C, et al. Phase I/II study of the tumour-targeting human monoclonal antibody-cytokine fusion protein L19-TNF in patients with advanced solid tumours. *J Cancer Res Clin Oncol*. 2013;139(3):447-455. doi:10.1007/s00432-012-1327-7.
335. Sridhar SS, Hotte SJ, Chin JL, et al. A multicenter phase II clinical trial of lapatinib (GW572016) in hormonally untreated advanced prostate cancer. *Am J Clin Oncol*. 2010;33(6):609-613. doi:10.1097/COC.0b013e3181beac33.
336. Iqbal S, Goldman B, Fenoglio-Preiser CM, et al. Southwest Oncology Group study S0413: a phase II trial of lapatinib (GW572016) as first-line therapy in patients with advanced or metastatic gastric cancer. *Ann Oncol Off J Eur Soc Med Oncol ESMO*. 2011;22(12):2610-2615. doi:10.1093/annonc/mdr021.
337. Del Campo JM, Hitt R, Sebastian P, et al. Effects of lapatinib monotherapy: results of a randomised phase II study in therapy-naive patients with locally advanced squamous cell carcinoma of the head and neck. *Br J Cancer*. 2011;105(5):618-627. doi:10.1038/bjc.2011.237.
338. Pestrin M, Bessi S, Puglisi F, et al. Final results of a multicenter phase II clinical trial evaluating the activity of single-agent lapatinib in patients with HER2-negative metastatic breast cancer and HER2-positive circulating tumor cells. A proof-of-concept study. *Breast Cancer Res Treat*. 2012;134(1):283-289. doi:10.1007/s10549-012-2045-1.
339. Thiessen B, Stewart C, Tsao M, et al. A phase I/II trial of GW572016 (lapatinib) in recurrent glioblastoma multiforme: clinical outcomes, pharmacokinetics and molecular correlation. *Cancer Chemother Pharmacol*. 2010;65(2):353-361. doi:10.1007/s00280-009-1041-6.
340. Ross HJ, Blumenschein GR Jr, Aisner J, et al. Randomized phase II multicenter trial of two schedules of lapatinib as first- or second-line monotherapy in patients with advanced or metastatic non-small cell lung cancer. *Clin Cancer Res Off J Am Assoc Cancer Res*. 2010;16(6):1938-1949. doi:10.1158/1078-0432.CCR-08-3328.

341. Garcia AA, Sill MW, Lankes HA, et al. A phase II evaluation of lapatinib in the treatment of persistent or recurrent epithelial ovarian or primary peritoneal carcinoma: a gynecologic oncology group study. *Gynecol Oncol*. 2012;124(3):569-574. doi:10.1016/j.ygyno.2011.10.022.
342. Schiller GJ, O'Brien SM, Pigneux A, et al. Single-agent laromustine, a novel alkylating agent, has significant activity in older patients with previously untreated poor-risk acute myeloid leukemia. *J Clin Oncol Off J Am Soc Clin Oncol*. 2010;28(5):815-821. doi:10.1200/JCO.2009.24.2008.
343. Witzig TE, Vose JM, Zinzani PL, et al. An international phase II trial of single-agent lenalidomide for relapsed or refractory aggressive B-cell non-Hodgkin's lymphoma. *Ann Oncol Off J Eur Soc Med Oncol ESMO*. 2011;22(7):1622-1627. doi:10.1093/annonc/mdq626.
344. Jabbour E, Thomas D, Kantarjian H, et al. Comparison of thalidomide and lenalidomide as therapy for myelofibrosis. *Blood*. 2011;118(4):899-902. doi:10.1182/blood-2010-12-325589.
345. Sekeres MA, Gundacker H, Lancet J, et al. A phase 2 study of lenalidomide monotherapy in patients with deletion 5q acute myeloid leukemia: Southwest Oncology Group Study S0605. *Blood*. 2011;118(3):523-528. doi:10.1182/blood-2011-02-337303.
346. Fehniger TA, Larson S, Trinkaus K, et al. A phase 2 multicenter study of lenalidomide in relapsed or refractory classical Hodgkin lymphoma. *Blood*. 2011;118(19):5119-5125. doi:10.1182/blood-2011-07-362475.
347. Fehniger TA, Uy GL, Trinkaus K, et al. A phase 2 study of high-dose lenalidomide as initial therapy for older patients with acute myeloid leukemia. *Blood*. 2011;117(6):1828-1833. doi:10.1182/blood-2010-07-297143.
348. Badoux XC, Keating MJ, Wen S, et al. Lenalidomide as initial therapy of elderly patients with chronic lymphocytic leukemia. *Blood*. 2011;118(13):3489-3498. doi:10.1182/blood-2011-03-339077.
349. Czuczman MS, Vose JM, Witzig TE, et al. The differential effect of lenalidomide monotherapy in patients with relapsed or refractory transformed non-Hodgkin lymphoma of distinct histological origin. *Br J Haematol*. 2011;154(4):477-481. doi:10.1111/j.1365-2141.2011.08781.x.
350. Eisen T, Trefzer U, Hamilton A, et al. Results of a multicenter, randomized, double-blind phase 2/3 study of lenalidomide in the treatment of pretreated relapsed or refractory metastatic malignant melanoma. *Cancer*. 2010;116(1):146-154. doi:10.1002/cncr.24686.
351. Dueck G, Chua N, Prasad A, et al. Interim report of a phase 2 clinical trial of lenalidomide for T-cell non-Hodgkin lymphoma. *Cancer*. 2010;116(19):4541-4548. doi:10.1002/cncr.25377.
352. Chanan-Khan A, Miller KC, Lawrence D, et al. Tumor flare reaction associated with lenalidomide treatment in patients with chronic lymphocytic leukemia predicts clinical response. *Cancer*. 2011;117(10):2127-2135. doi:10.1002/cncr.25748.
353. Chen CI, Bergsagel PL, Paul H, et al. Single-agent lenalidomide in the treatment of previously untreated chronic lymphocytic leukemia. *J Clin Oncol Off J Am Soc Clin Oncol*. 2011;29(9):1175-1181. doi:10.1200/JCO.2010.29.8133.

354. Sher T, Miller KC, Lawrence D, et al. Efficacy of lenalidomide in patients with chronic lymphocytic leukemia with high-risk cytogenetics. *Leuk Lymphoma*. 2010;51(1):85-88. doi:10.3109/10428190903406806.
355. Zinzani PL, Pellegrini C, Broccoli A, et al. Lenalidomide monotherapy for relapsed/refractory peripheral T-cell lymphoma not otherwise specified. *Leuk Lymphoma*. 2011;52(8):1585-1588. doi:10.3109/10428194.2011.573031.
356. Toh HC, Chen P-J, Carr BI, et al. Phase 2 trial of linifanib (ABT-869) in patients with unresectable or metastatic hepatocellular carcinoma. *Cancer*. 2013;119(2):380-387. doi:10.1002/cncr.27758.
357. Tannir NM, Wong Y-N, Kollmannsberger CK, et al. Phase 2 trial of linifanib (ABT-869) in patients with advanced renal cell cancer after sunitinib failure. *Eur J Cancer Oxf Engl 1990*. 2011;47(18):2706-2714. doi:10.1016/j.ejca.2011.09.002.
358. Tan E-H, Goss GD, Salgia R, et al. Phase 2 trial of Linifanib (ABT-869) in patients with advanced non-small cell lung cancer. *J Thorac Oncol Off Publ Int Assoc Study Lung Cancer*. 2011;6(8):1418-1425. doi:10.1097/JTO.0b013e318220c93e.
359. Lubner SJ, Kunnimalaiyaan M, Holen KD, et al. A preclinical and clinical study of lithium in low-grade neuroendocrine tumors. *The oncologist*. 2011;16(4):452-457. doi:10.1634/theoncologist.2010-0323.
360. Trarbach T, Moehler M, Heinemann V, et al. Phase II trial of mapatumumab, a fully human agonistic monoclonal antibody that targets and activates the tumour necrosis factor apoptosis-inducing ligand receptor-1 (TRAIL-R1), in patients with refractory colorectal cancer. *Br J Cancer*. 2010;102(3):506-512. doi:10.1038/sj.bjc.6605507.
361. Younes A, Vose JM, Zelenetz AD, et al. A Phase 1b/2 trial of mapatumumab in patients with relapsed/refractory non-Hodgkin's lymphoma. *Br J Cancer*. 2010;103(12):1783-1787. doi:10.1038/sj.bjc.6605987.
362. Faris JE, Arnott J, Zheng H, et al. A phase 2 study of oral MKC-1, an inhibitor of importin- $\beta$ , tubulin, and the mTOR pathway in patients with unresectable or metastatic pancreatic cancer. *Invest New Drugs*. 2012;30(4):1614-1620. doi:10.1007/s10637-011-9708-3.
363. Younes A, Oki Y, Bociek RG, et al. Mocetinostat for relapsed classical Hodgkin's lymphoma: an open-label, single-arm, phase 2 trial. *Lancet Oncol*. 2011;12(13):1222-1228. doi:10.1016/S1470-2045(11)70265-0.
364. Gökbuget N, Basara N, Baurmann H, et al. High single-drug activity of nelarabine in relapsed T-lymphoblastic leukemia/lymphoma offers curative option with subsequent stem cell transplantation. *Blood*. 2011;118(13):3504-3511. doi:10.1182/blood-2011-01-329441.
365. Santoro A, Pressiani T, Citterio G, et al. Activity and safety of NGR-hTNF, a selective vascular-targeting agent, in previously treated patients with advanced hepatocellular carcinoma. *Br J Cancer*. 2010;103(6):837-844. doi:10.1038/sj.bjc.6605858.
366. Santoro A, Rimassa L, Sobrero AF, et al. Phase II study of NGR-hTNF, a selective vascular targeting agent, in patients with metastatic colorectal cancer after failure of standard therapy. *Eur J Cancer Oxf Engl 1990*. 2010;46(15):2746-2752. doi:10.1016/j.ejca.2010.07.012.

367. Gregorc V, Zucali PA, Santoro A, et al. Phase II study of asparagine-glycine-arginine-human tumor necrosis factor alpha, a selective vascular targeting agent, in previously treated patients with malignant pleural mesothelioma. *J Clin Oncol Off J Am Soc Clin Oncol*. 2010;28(15):2604-2611. doi:10.1200/JCO.2009.27.3649.
368. Strumberg D, Schultheis B, Scheulen ME, et al. Safety, efficacy and pharmacokinetics of nimotuzumab, a humanized monoclonal anti-epidermal growth factor receptor (EGFR) antibody, in patients with locally advanced or metastatic pancreatic cancer. *Int J Clin Pharmacol Ther*. 2010;48(7):473-475.
369. Strumberg D, Schultheis B, Scheulen ME, et al. Phase II study of nimotuzumab, a humanized monoclonal anti-epidermal growth factor receptor (EGFR) antibody, in patients with locally advanced or metastatic pancreatic cancer. *Invest New Drugs*. 2012;30(3):1138-1143. doi:10.1007/s10637-010-9619-8.
370. Reck M, Kaiser R, Eschbach C, et al. A phase II double-blind study to investigate efficacy and safety of two doses of the triple angiokinase inhibitor BIBF 1120 in patients with relapsed advanced non-small-cell lung cancer. *Ann Oncol Off J Eur Soc Med Oncol ESMO*. 2011;22(6):1374-1381. doi:10.1093/annonc/mdq618.
371. Parikh SA, Kantarjian H, Schimmer A, et al. Phase II study of obatoclox mesylate (GX15-070), a small-molecule BCL-2 family antagonist, for patients with myelofibrosis. *Clin Lymphoma Myeloma Leuk*. 2010;10(4):285-289. doi:10.3816/CLML.2010.n.059.
372. Kanai F, Yoshida H, Tateishi R, et al. A phase I/II trial of the oral antiangiogenic agent TSU-68 in patients with advanced hepatocellular carcinoma. *Cancer Chemother Pharmacol*. 2011;67(2):315-324. doi:10.1007/s00280-010-1320-2.
373. Lortholary A, Largillier R, Weber B, et al. Weekly paclitaxel as a single agent or in combination with carboplatin or weekly topotecan in patients with resistant ovarian cancer: the CARTAXHY randomized phase II trial from Groupe d'Investigateurs Nationaux pour l'Etude des Cancers Ovariens (GINECO). *Ann Oncol Off J Eur Soc Med Oncol ESMO*. 2012;23(2):346-352. doi:10.1093/annonc/mdr149.
374. Tahara M, Minami H, Hasegawa Y, et al. Weekly paclitaxel in patients with recurrent or metastatic head and neck cancer. *Cancer Chemother Pharmacol*. 2011;68(3):769-776. doi:10.1007/s00280-010-1550-3.
375. Kato K, Tahara M, Hironaka S, et al. A phase II study of paclitaxel by weekly 1-h infusion for advanced or recurrent esophageal cancer in patients who had previously received platinum-based chemotherapy. *Cancer Chemother Pharmacol*. 2011;67(6):1265-1272. doi:10.1007/s00280-010-1422-x.
376. Gupta S, Bharath R, Shet T, et al. Single agent weekly paclitaxel as neoadjuvant chemotherapy in locally advanced breast cancer: a feasibility study. *Clin Oncol R Coll Radiol G B*. 2012;24(9):604-609. doi:10.1016/j.clon.2011.09.012.
377. Di Lorenzo G, Federico P, Buonerba C, et al. Paclitaxel in pretreated metastatic penile cancer: final results of a phase 2 study. *Eur Urol*. 2011;60(6):1280-1284. doi:10.1016/j.eururo.2011.08.028.

378. Ichikawa M, Suzuki R, Kataoka K, et al. Second-line weekly paclitaxel in resistant or relapsed non-small cell lung cancer treated with docetaxel and carboplatin: a multi-center phase II study. *Lung Cancer Amst Neth*. 2010;69(3):319-322. doi:10.1016/j.lungcan.2009.11.021.
379. Paik PK, James LP, Riely GJ, et al. A phase 2 study of weekly albumin-bound paclitaxel (Abraxane®) given as a two-hour infusion. *Cancer Chemother Pharmacol*. 2011;68(5):1331-1337. doi:10.1007/s00280-011-1621-0.
380. Hersh EM, O'Day SJ, Ribas A, et al. A phase 2 clinical trial of nab-paclitaxel in previously treated and chemotherapy-naïve patients with metastatic melanoma. *Cancer*. 2010;116(1):155-163. doi:10.1002/cncr.24720.
381. Mirtsching B, Cosgriff T, Harker G, Keaton M, Chidiac T, Min M. A phase II study of weekly nanoparticle albumin-bound paclitaxel with or without trastuzumab in metastatic breast cancer. *Clin Breast Cancer*. 2011;11(2):121-128. doi:10.1016/j.clbc.2011.03.007.
382. Coleman RL, Brady WE, McMeekin DS, et al. A phase II evaluation of nanoparticle, albumin-bound (nab) paclitaxel in the treatment of recurrent or persistent platinum-resistant ovarian, fallopian tube, or primary peritoneal cancer: a Gynecologic Oncology Group study. *Gynecol Oncol*. 2011;122(1):111-115. doi:10.1016/j.ygyno.2011.03.036.
383. Alberts DS, Blessing JA, Landrum LM, et al. Phase II trial of nab-paclitaxel in the treatment of recurrent or persistent advanced cervix cancer: A gynecologic oncology group study. *Gynecol Oncol*. 2012;127(3):451-455. doi:10.1016/j.ygyno.2012.09.008.
384. Lee J-L, Ahn J-H, Park SH, et al. Phase II study of a cremophor-free, polymeric micelle formulation of paclitaxel for patients with advanced urothelial cancer previously treated with gemcitabine and platinum. *Invest New Drugs*. 2012;30(5):1984-1990. doi:10.1007/s10637-011-9757-7.
385. Saif MW, Podoltsev NA, Rubin MS, et al. Phase II clinical trial of paclitaxel loaded polymeric micelle in patients with advanced pancreatic cancer. *Cancer Invest*. 2010;28(2):186-194. doi:10.3109/07357900903179591.
386. Kato K, Chin K, Yoshikawa T, et al. Phase II study of NK105, a paclitaxel-incorporating micellar nanoparticle, for previously treated advanced or recurrent gastric cancer. *Invest New Drugs*. 2012;30(4):1621-1627. doi:10.1007/s10637-011-9709-2.
387. Hecht JR, Mitchell E, Neubauer MA, et al. Lack of correlation between epidermal growth factor receptor status and response to Panitumumab monotherapy in metastatic colorectal cancer. *Clin Cancer Res Off J Am Assoc Cancer Res*. 2010;16(7):2205-2213. doi:10.1158/1078-0432.CCR-09-2017.
388. Wadlow RC, Hezel AF, Abrams TA, et al. Panitumumab in patients with KRAS wild-type colorectal cancer after progression on cetuximab. *The oncologist*. 2012;17(1):14. doi:10.1634/theoncologist.2011-0452.
389. Dimicoli S, Jabbour E, Borthakur G, et al. Phase II study of the histone deacetylase inhibitor panobinostat (LBH589) in patients with low or intermediate-1 risk myelodysplastic syndrome. *Am J Hematol*. 2012;87(1):127-129. doi:10.1002/ajh.22198.
390. Chi KN, Beardsley E, Eigel BJ, et al. A phase 2 study of patupilone in patients with metastatic castration-resistant prostate cancer previously treated with docetaxel: Canadian Urologic

Oncology Group study P07a. *Ann Oncol Off J Eur Soc Med Oncol ESMO*. 2012;23(1):53-58. doi:10.1093/annonc/mdr336.

391. Lim W-T, Ng Q-S, Ivy P, et al. A Phase II study of pazopanib in Asian patients with recurrent/metastatic nasopharyngeal carcinoma. *Clin Cancer Res Off J Am Assoc Cancer Res*. 2011;17(16):5481-5489. doi:10.1158/1078-0432.CCR-10-3409.
392. Friedlander M, Hancock KC, Rischin D, et al. A Phase II, open-label study evaluating pazopanib in patients with recurrent ovarian cancer. *Gynecol Oncol*. 2010;119(1):32-37. doi:10.1016/j.ygyno.2010.05.033.
393. Bible KC, Suman VJ, Menefee ME, et al. A multiinstitutional phase 2 trial of pazopanib monotherapy in advanced anaplastic thyroid cancer. *J Clin Endocrinol Metab*. 2012;97(9):3179-3184. doi:10.1210/jc.2012-1520.
394. Necchi A, Mariani L, Zaffaroni N, et al. Pazopanib in advanced and platinum-resistant urothelial cancer: an open-label, single group, phase 2 trial. *Lancet Oncol*. 2012;13(8):810-816. doi:10.1016/S1470-2045(12)70294-2.
395. Iwamoto FM, Lamborn KR, Robins HI, et al. Phase II trial of pazopanib (GW786034), an oral multi-targeted angiogenesis inhibitor, for adults with recurrent glioblastoma (North American Brain Tumor Consortium Study 06-02). *Neuro-Oncol*. 2010;12(8):855-861. doi:10.1093/neuonc/noq025.
396. Taylor SK, Chia S, Dent S, et al. A phase II study of pazopanib in patients with recurrent or metastatic invasive breast carcinoma: a trial of the Princess Margaret Hospital phase II consortium. *The oncologist*. 2010;15(8):810-818. doi:10.1634/theoncologist.2010-0081.
397. Haura EB, Ricart AD, Larson TG, et al. A phase II study of PD-0325901, an oral MEK inhibitor, in previously treated patients with advanced non-small cell lung cancer. *Clin Cancer Res Off J Am Assoc Cancer Res*. 2010;16(8):2450-2457. doi:10.1158/1078-0432.CCR-09-1920.
398. Lorusso D, Ferrandina G, Pignata S, et al. Evaluation of pemetrexed (Alimta, LY231514) as second-line chemotherapy in persistent or recurrent carcinoma of the cervix: the CERVIX 1 study of the MITO (Multicentre Italian Trials in Ovarian Cancer and Gynecologic Malignancies) Group. *Ann Oncol Off J Eur Soc Med Oncol ESMO*. 2010;21(1):61-66. doi:10.1093/annonc/mdp266.
399. Robert NJ, Conkling PR, O'Rourke MA, et al. Results of a phase II study of pemetrexed as first-line chemotherapy in patients with advanced or metastatic breast cancer. *Breast Cancer Res Treat*. 2011;126(1):101-108. doi:10.1007/s10549-010-1286-0.
400. Chan JA, Zhu AX, Stuart K, et al. Phase II study of pemetrexed in patients with advanced neuroendocrine tumors. *Cancer Chemother Pharmacol*. 2010;66(5):961-968. doi:10.1007/s00280-010-1248-6.
401. Rudin CM, Mauer A, Smakal M, et al. Phase I/II study of pemetrexed with or without ABT-751 in advanced or metastatic non-small-cell lung cancer. *J Clin Oncol Off J Am Soc Clin Oncol*. 2011;29(8):1075-1082. doi:10.1200/JCO.2010.32.5944.
402. Hainsworth JD, Cebotaru CL, Kanarev V, et al. A phase II, open-label, randomized study to assess the efficacy and safety of AZD6244 (ARRY-142886) versus pemetrexed in patients with non-small cell lung cancer who have failed one or two prior chemotherapeutic regimens. *J*



*Thorac Oncol Off Publ Int Assoc Study Lung Cancer.* 2010;5(10):1630-1636.  
doi:10.1097/JTO.0b013e3181e8b3a3.

403. Schiller JH, von Pawel J, Schütt P, et al. Pemetrexed with or without matuzumab as second-line treatment for patients with stage IIIB/IV non-small cell lung cancer. *J Thorac Oncol Off Publ Int Assoc Study Lung Cancer.* 2010;5(12):1977-1985. doi:10.1097/JTO.0b013e3181f4a5c9.
404. Ghobrial IM, Roccaro A, Hong F, et al. Clinical and translational studies of a phase II trial of the novel oral Akt inhibitor perifosine in relapsed or relapsed/refractory Waldenstrom's macroglobulinemia. *Clin Cancer Res Off J Am Assoc Cancer Res.* 2010;16(3):1033-1041. doi:10.1158/1078-0432.CCR-09-1837.
405. Gianni L, Lladó A, Bianchi G, et al. Open-label, phase II, multicenter, randomized study of the efficacy and safety of two dose levels of Pertuzumab, a human epidermal growth factor receptor 2 dimerization inhibitor, in patients with human epidermal growth factor receptor 2-negative metastatic breast cancer. *J Clin Oncol Off J Am Soc Clin Oncol.* 2010;28(7):1131-1137. doi:10.1200/JCO.2009.24.1661.
406. Baudin E, Droz JP, Paz-Ares L, van Oosterom AT, Cullell-Young M, Schlumberger M. Phase II study of plitidepsin 3-hour infusion every 2 weeks in patients with unresectable advanced medullary thyroid carcinoma. *Am J Clin Oncol.* 2010;33(1):83-88. doi:10.1097/COC.0b013e31819fdf5e.
407. Mateos MV, Cibeira MT, Richardson PG, et al. Phase II clinical and pharmacokinetic study of plitidepsin 3-hour infusion every two weeks alone or with dexamethasone in relapsed and refractory multiple myeloma. *Clin Cancer Res Off J Am Assoc Cancer Res.* 2010;16(12):3260-3269. doi:10.1158/1078-0432.CCR-10-0469.
408. Short KD, Rajkumar SV, Larson D, et al. Incidence of extramedullary disease in patients with multiple myeloma in the era of novel therapy, and the activity of pomalidomide on extramedullary myeloma. *Leukemia.* 2011;25(6):906-908. doi:10.1038/leu.2011.29.
409. Malik SM, Liu K, Qiang X, et al. Folutyn (pralatrexate injection) for the treatment of patients with relapsed or refractory peripheral T-cell lymphoma: U.S. Food and Drug Administration drug approval summary. *Clin Cancer Res Off J Am Assoc Cancer Res.* 2010;16(20):4921-4927. doi:10.1158/1078-0432.CCR-10-1214.
410. O'Connor OA, Pro B, Pinter-Brown L, et al. Pralatrexate in patients with relapsed or refractory peripheral T-cell lymphoma: results from the pivotal PROPEL study. *J Clin Oncol Off J Am Soc Clin Oncol.* 2011;29(9):1182-1189. doi:10.1200/JCO.2010.29.9024.
411. Ramanathan RK, Abbruzzese J, Dragovich T, et al. A randomized phase II study of PX-12, an inhibitor of thioredoxin in patients with advanced cancer of the pancreas following progression after a gemcitabine-containing combination. *Cancer Chemother Pharmacol.* 2011;67(3):503-509. doi:10.1007/s00280-010-1343-8.
412. Ramaswamy B, Mrozek E, Kuebler JP, Bekaii-Saab T, Kraut EH. Phase II trial of pyrazoloacridine (NSC#366140) in patients with metastatic breast cancer. *Invest New Drugs.* 2011;29(2):347-351. doi:10.1007/s10637-009-9338-1.
413. Pappo AS, Patel SR, Crowley J, et al. R1507, a monoclonal antibody to the insulin-like growth factor 1 receptor, in patients with recurrent or refractory Ewing sarcoma family of tumors: results

of a phase II Sarcoma Alliance for Research through Collaboration study. *J Clin Oncol Off J Am Soc Clin Oncol*. 2011;29(34):4541-4547. doi:10.1200/JCO.2010.34.0000.

414. Viéitez JM, Valladares M, Peláez I, et al. A randomized phase II study of raltitrexed and gefitinib versus raltitrexed alone as second line chemotherapy in patients with colorectal cancer. (1839IL/0143). *Invest New Drugs*. 2011;29(5):1038-1044. doi:10.1007/s10637-010-9400-z.
415. Sequist LV, Gettinger S, Senzer NN, et al. Activity of IPI-504, a novel heat-shock protein 90 inhibitor, in patients with molecularly defined non-small-cell lung cancer. *J Clin Oncol Off J Am Soc Clin Oncol*. 2010;28(33):4953-4960. doi:10.1200/JCO.2010.30.8338.
416. Amato RJ, Wilding G, Bublely G, Loewy J, Haluska F, Gross ME. Safety and preliminary efficacy analysis of the mTOR inhibitor ridaforolimus in patients with taxane-treated, castration-resistant prostate cancer. *Clin Genitourin Cancer*. 2012;10(4):232-238. doi:10.1016/j.clgc.2012.05.001.
417. Chawla SP, Staddon AP, Baker LH, et al. Phase II study of the mammalian target of rapamycin inhibitor ridaforolimus in patients with advanced bone and soft tissue sarcomas. *J Clin Oncol Off J Am Soc Clin Oncol*. 2012;30(1):78-84. doi:10.1200/JCO.2011.35.6329.
418. Schöffski P, Garcia JA, Stadler WM, et al. A phase II study of the efficacy and safety of AMG 102 in patients with metastatic renal cell carcinoma. *BJU Int*. 2011;108(5):679-686. doi:10.1111/j.1464-410X.2010.09947.x.
419. Wen PY, Schiff D, Cloughesy TF, et al. A phase II study evaluating the efficacy and safety of AMG 102 (rilutimumab) in patients with recurrent glioblastoma. *Neuro-Oncol*. 2011;13(4):437-446. doi:10.1093/neuonc/noq198.
420. Molife LR, Attard G, Fong PC, et al. Phase II, two-stage, single-arm trial of the histone deacetylase inhibitor (HDACi) romidepsin in metastatic castration-resistant prostate cancer (CRPC). *Ann Oncol Off J Eur Soc Med Oncol ESMO*. 2010;21(1):109-113. doi:10.1093/annonc/mdp270.
421. Piekarz RL, Frye R, Prince HM, et al. Phase 2 trial of romidepsin in patients with peripheral T-cell lymphoma. *Blood*. 2011;117(22):5827-5834. doi:10.1182/blood-2010-10-312603.
422. Niesvizky R, Ely S, Mark T, et al. Phase 2 trial of the histone deacetylase inhibitor romidepsin for the treatment of refractory multiple myeloma. *Cancer*. 2011;117(2):336-342. doi:10.1002/cncr.25584.
423. Whittaker SJ, Demierre M-F, Kim EJ, et al. Final results from a multicenter, international, pivotal study of romidepsin in refractory cutaneous T-cell lymphoma. *J Clin Oncol Off J Am Soc Clin Oncol*. 2010;28(29):4485-4491. doi:10.1200/JCO.2010.28.9066.
424. Otterson GA, Hodgson L, Pang H, Vokes EE, Cancer and Leukemia Group B. Phase II study of the histone deacetylase inhibitor Romidepsin in relapsed small cell lung cancer (Cancer and Leukemia Group B 30304). *J Thorac Oncol Off Publ Int Assoc Study Lung Cancer*. 2010;5(10):1644-1648. doi:10.1097/JTO.0b013e3181ec1713.
425. Iwamoto FM, Lamborn KR, Kuhn JG, et al. A phase I/II trial of the histone deacetylase inhibitor romidepsin for adults with recurrent malignant glioma: North American Brain Tumor Consortium Study 03-03. *Neuro-Oncol*. 2011;13(5):509-516. doi:10.1093/neuonc/nor017.

426. Haigentz M Jr, Kim M, Sarta C, et al. Phase II trial of the histone deacetylase inhibitor romidepsin in patients with recurrent/metastatic head and neck cancer. *Oral Oncol.* 2012;48(12):1281-1288. doi:10.1016/j.oraloncology.2012.05.024.
427. Katsumata N, Hirai Y, Kamiura S, et al. Phase II study of S-1, an oral fluoropyrimidine, in patients with advanced or recurrent cervical cancer. *Ann Oncol Off J Eur Soc Med Oncol ESMO.* 2011;22(6):1353-1357. doi:10.1093/annonc/mdq602.
428. Komatsu Y, Takahashi Y, Kimura Y, et al. Randomized phase II trial of first-line treatment with tailored irinotecan and S-1 therapy versus S-1 monotherapy for advanced or recurrent gastric carcinoma (JFMC31-0301). *Anticancer Drugs.* 2011;22(6):576-583. doi:10.1097/CAD.0b013e328345b509.
429. Nishiyama O, Taniguchi H, Kondoh Y, et al. Phase II study of S-1 monotherapy as a first-line treatment for elderly patients with advanced non-small-cell lung cancer: the Central Japan Lung Study Group trial 0404. *Anticancer Drugs.* 2011;22(8):811-816. doi:10.1097/CAD.0b013e3283440231.
430. Naito S, Tsukamoto T, Usami M, Fujimoto H, Akaza H. An early phase II trial of S-1 in Japanese patients with cytokine-refractory metastatic renal cell carcinoma. *Cancer Chemother Pharmacol.* 2010;66(6):1065-1070. doi:10.1007/s00280-010-1262-8.
431. Koizumi W, Akiya T, Sato A, et al. Phase II study of S-1 as first-line treatment for elderly patients over 75 years of age with advanced gastric cancer: the Tokyo Cooperative Oncology Group study. *Cancer Chemother Pharmacol.* 2010;65(6):1093-1099. doi:10.1007/s00280-009-1114-6.
432. Sudo K, Yamaguchi T, Nakamura K, et al. Phase II study of S-1 in patients with gemcitabine-resistant advanced pancreatic cancer. *Cancer Chemother Pharmacol.* 2011;67(2):249-254. doi:10.1007/s00280-010-1311-3.
433. Chen J-S, Chao Y, Hsieh R-K, et al. A phase II and pharmacokinetic study of first line S-1 for advanced gastric cancer in Taiwan. *Cancer Chemother Pharmacol.* 2011;67(6):1281-1289. doi:10.1007/s00280-010-1416-8.
434. Shiroyama T, Kijima T, Komuta K, et al. Phase II tailored S-1 regimen study of first-line chemotherapy in elderly patients with advanced and recurrent non-small cell lung cancer. *Cancer Chemother Pharmacol.* 2012;70(6):783-789. doi:10.1007/s00280-012-1958-z.
435. Wada M, Yamamoto M, Ryuge S, et al. Phase II study of S-1 monotherapy in patients with previously treated, advanced non-small-cell lung cancer. *Cancer Chemother Pharmacol.* 2012;69(4):1005-1011. doi:10.1007/s00280-011-1795-5.
436. Furuse J, Okusaka T, Kaneko S, et al. Phase I/II study of the pharmacokinetics, safety and efficacy of S-1 in patients with advanced hepatocellular carcinoma. *Cancer Sci.* 2010;101(12):2606-2611. doi:10.1111/j.1349-7006.2010.01730.x.
437. Strumberg D, Bergmann L, Graeven U, et al. First-line treatment of patients with metastatic pancreatic cancer: results of a Phase II trial with S-1 (CESAR-Study group). *Int J Clin Pharmacol Ther.* 2010;48(7):470-472.
438. Schultheis B, Strumberg D, Bergmann L, et al. Results of a phase II trial of S-1 as first-line treatment of metastatic pancreatic cancer (CESAR-study group). *Invest New Drugs.* 2012;30(3):1184-1192. doi:10.1007/s10637-011-9665-x.

439. Sasaki T, Isayama H, Nakai Y, et al. Multicenter phase II study of S-1 monotherapy as second-line chemotherapy for advanced biliary tract cancer refractory to gemcitabine. *Invest New Drugs*. 2012;30(2):708-713. doi:10.1007/s10637-010-9553-9.
440. Govindan R, Morgensztern D, Kommor MD, et al. Phase II trial of S-1 as second-line therapy in patients with advanced non-small cell lung cancer. *J Thorac Oncol Off Publ Int Assoc Study Lung Cancer*. 2011;6(4):790-795. doi:10.1097/JTO.0b013e3182103b51.
441. Shiroyama T, Komuta K, Imamura F, et al. Phase II study of S-1 monotherapy in platinum-refractory, advanced non-small cell lung cancer. *Lung Cancer Amst Neth*. 2011;74(1):85-88. doi:10.1016/j.lungcan.2011.01.017.
442. Stupp R, Tosoni A, Bromberg JEC, et al. Sagopilone (ZK-EPO, ZK 219477) for recurrent glioblastoma. A phase II multicenter trial by the European Organisation for Research and Treatment of Cancer (EORTC) Brain Tumor Group. *Ann Oncol Off J Eur Soc Med Oncol ESMO*. 2011;22(9):2144-2149. doi:10.1093/annonc/mdq729.
443. Rustin G, Reed N, Jayson GC, et al. A phase II trial evaluating two schedules of sagopilone (ZK-EPO), a novel epothilone, in patients with platinum-resistant ovarian cancer. *Ann Oncol Off J Eur Soc Med Oncol ESMO*. 2011;22(11):2411-2416. doi:10.1093/annonc/mdq780.
444. DeConti RC, Algazi AP, Andrews S, et al. Phase II trial of sagopilone, a novel epothilone analog in metastatic melanoma. *Br J Cancer*. 2010;103(10):1548-1553. doi:10.1038/sj.bjc.6605931.
445. Morrow PK, Divers S, Provencher L, et al. Phase II study evaluating the efficacy and safety of sagopilone (ZK-EPO) in patients with metastatic breast cancer that has progressed following chemotherapy. *Breast Cancer Res Treat*. 2010;123(3):837-842. doi:10.1007/s10549-010-1102-x.
446. Freedman RA, Bullitt E, Sun L, et al. A phase II study of sagopilone (ZK 219477; ZK-EPO) in patients with breast cancer and brain metastases. *Clin Breast Cancer*. 2011;11(6):376-383. doi:10.1016/j.clbc.2011.03.024.
447. Fury MG, Baxi S, Shen R, et al. Phase II study of saracatinib (AZD0530) for patients with recurrent or metastatic head and neck squamous cell carcinoma (HNSCC). *Anticancer Res*. 2011;31(1):249-253.
448. Arcaroli J, Quackenbush K, Dasari A, et al. Biomarker-driven trial in metastatic pancreas cancer: feasibility in a multicenter study of saracatinib, an oral Src inhibitor, in previously treated pancreatic cancer. *Cancer Med*. 2012;1(2):207-217. doi:10.1002/cam4.27.
449. Gucaip A, Sparano JA, Caravelli J, et al. Phase II trial of saracatinib (AZD0530), an oral SRC-inhibitor for the treatment of patients with hormone receptor-negative metastatic breast cancer. *Clin Breast Cancer*. 2011;11(5):306-311. doi:10.1016/j.clbc.2011.03.021.
450. Mackay HJ, Au HJ, McWhirter E, et al. A phase II trial of the Src kinase inhibitor saracatinib (AZD0530) in patients with metastatic or locally advanced gastric or gastro esophageal junction (GEJ) adenocarcinoma: a trial of the PMH phase II consortium. *Invest New Drugs*. 2012;30(3):1158-1163. doi:10.1007/s10637-011-9650-4.
451. Kirkwood JM, Bastholt L, Robert C, et al. Phase II, open-label, randomized trial of the MEK1/2 inhibitor selumetinib as monotherapy versus temozolomide in patients with advanced

melanoma. *Clin Cancer Res Off J Am Assoc Cancer Res*. 2012;18(2):555-567. doi:10.1158/1078-0432.CCR-11-1491.

452. O'Neil BH, Goff LW, Kauh JSW, et al. Phase II study of the mitogen-activated protein kinase 1/2 inhibitor selumetinib in patients with advanced hepatocellular carcinoma. *J Clin Oncol Off J Am Soc Clin Oncol*. 2011;29(17):2350-2356. doi:10.1200/JCO.2010.33.9432.
453. Bekaii-Saab T, Phelps MA, Li X, et al. Multi-institutional phase II study of selumetinib in patients with metastatic biliary cancers. *J Clin Oncol Off J Am Soc Clin Oncol*. 2011;29(17):2357-2363. doi:10.1200/JCO.2010.33.9473.
454. Farley J, Brady WE, Vathipadiekal V, et al. Selumetinib in women with recurrent low-grade serous carcinoma of the ovary or peritoneum: an open-label, single-arm, phase 2 study. *Lancet Oncol*. 2013;14(2):134-140. doi:10.1016/S1470-2045(12)70572-7.
455. Rossi J-F, Négrier S, James ND, et al. A phase I/II study of siltuximab (CNTO 328), an anti-interleukin-6 monoclonal antibody, in metastatic renal cell cancer. *Br J Cancer*. 2010;103(8):1154-1162. doi:10.1038/sj.bjc.6605872.
456. Dorff TB, Goldman B, Pinski JK, et al. Clinical and correlative results of SWOG S0354: a phase II trial of CNTO328 (siltuximab), a monoclonal antibody against interleukin-6, in chemotherapy-pretreated patients with castration-resistant prostate cancer. *Clin Cancer Res Off J Am Assoc Cancer Res*. 2010;16(11):3028-3034. doi:10.1158/1078-0432.CCR-09-3122.
457. Coward J, Kulbe H, Chakravarty P, et al. Interleukin-6 as a therapeutic target in human ovarian cancer. *Clin Cancer Res Off J Am Assoc Cancer Res*. 2011;17(18):6083-6096. doi:10.1158/1078-0432.CCR-11-0945.
458. Grignani G, Palmerini E, Dileo P, et al. A phase II trial of sorafenib in relapsed and unresectable high-grade osteosarcoma after failure of standard multimodal therapy: an Italian Sarcoma Group study. *Ann Oncol Off J Eur Soc Med Oncol ESMO*. 2012;23(2):508-516. doi:10.1093/annonc/mdr151.
459. Naito S, Tsukamoto T, Murai M, Fukino K, Akaza H. Overall survival and good tolerability of long-term use of sorafenib after cytokine treatment: final results of a phase II trial of sorafenib in Japanese patients with metastatic renal cell carcinoma. *BJU Int*. 2011;108(11):1813-1819. doi:10.1111/j.1464-410X.2011.10281.x.
460. Bengala C, Bertolini F, Malavasi N, et al. Sorafenib in patients with advanced biliary tract carcinoma: a phase II trial. *Br J Cancer*. 2010;102(1):68-72. doi:10.1038/sj.bjc.6605458.
461. Dy GK, Hillman SL, Rowland KM Jr, et al. A front-line window of opportunity phase 2 study of sorafenib in patients with advanced nonsmall cell lung cancer: North Central Cancer Treatment Group Study N0326. *Cancer*. 2010;116(24):5686-5693. doi:10.1002/cncr.25448.
462. Von Mehren M, Rankin C, Goldblum JR, et al. Phase 2 Southwest Oncology Group-directed intergroup trial (S0505) of sorafenib in advanced soft tissue sarcomas. *Cancer*. 2012;118(3):770-776. doi:10.1002/cncr.26334.
463. Kelly RJ, Rajan A, Force J, et al. Evaluation of KRAS mutations, angiogenic biomarkers, and DCE-MRI in patients with advanced non-small-cell lung cancer receiving sorafenib. *Clin Cancer Res Off J Am Assoc Cancer Res*. 2011;17(5):1190-1199. doi:10.1158/1078-0432.CCR-10-2331.

464. Ahmed M, Barbachano Y, Riddell A, et al. Analysis of the efficacy and toxicity of sorafenib in thyroid cancer: a phase II study in a UK based population. *Eur J Endocrinol Eur Fed Endocr Soc.* 2011;165(2):315-322. doi:10.1530/EJE-11-0129.
465. Nimeiri HS, Oza AM, Morgan RJ, et al. A phase II study of sorafenib in advanced uterine carcinoma/carcinosarcoma: a trial of the Chicago, PMH, and California Phase II Consortia. *Gynecol Oncol.* 2010;117(1):37-40. doi:10.1016/j.ygyno.2010.01.013.
466. Bodnar L, Górnas M, Szczylik C. Sorafenib as a third line therapy in patients with epithelial ovarian cancer or primary peritoneal cancer: a phase II study. *Gynecol Oncol.* 2011;123(1):33-36. doi:10.1016/j.ygyno.2011.06.019.
467. Sridhar SS, Winkvist E, Eisen A, et al. A phase II trial of sorafenib in first-line metastatic urothelial cancer: a study of the PMH Phase II Consortium. *Invest New Drugs.* 2011;29(5):1045-1049. doi:10.1007/s10637-010-9408-4.
468. Pacey S, Ratain MJ, Flaherty KT, et al. Efficacy and safety of sorafenib in a subset of patients with advanced soft tissue sarcoma from a Phase II randomized discontinuation trial. *Invest New Drugs.* 2011;29(3):481-488. doi:10.1007/s10637-009-9367-9.
469. El-Khoueiry AB, Ramanathan RK, Yang DY, et al. A randomized phase II of gemcitabine and sorafenib versus sorafenib alone in patients with metastatic pancreatic cancer. *Invest New Drugs.* 2012;30(3):1175-1183. doi:10.1007/s10637-011-9658-9.
470. El-Khoueiry AB, Rankin CJ, Ben-Josef E, et al. SWOG 0514: a phase II study of sorafenib in patients with unresectable or metastatic gallbladder carcinoma and cholangiocarcinoma. *Invest New Drugs.* 2012;30(4):1646-1651. doi:10.1007/s10637-011-9719-0.
471. Semrad TJ, Eddings C, Pan C-X, et al. Feasibility study of intra-patient sorafenib dose-escalation or re-escalation in patients with previously treated advanced solid tumors. *Invest New Drugs.* 2012;30(5):2001-2007. doi:10.1007/s10637-011-9761-y.
472. Williamson SK, Moon J, Huang CH, et al. Phase II evaluation of sorafenib in advanced and metastatic squamous cell carcinoma of the head and neck: Southwest Oncology Group Study S0420. *J Clin Oncol Off J Am Soc Clin Oncol.* 2010;28(20):3330-3335. doi:10.1200/JCO.2009.25.6834.
473. Matei D, Sill MW, Lankes HA, et al. Activity of sorafenib in recurrent ovarian cancer and primary peritoneal carcinomatosis: a gynecologic oncology group trial. *J Clin Oncol Off J Am Soc Clin Oncol.* 2011;29(1):69-75. doi:10.1200/JCO.2009.26.7856.
474. Dubey S, Jänne PA, Krug L, et al. A phase II study of sorafenib in malignant mesothelioma: results of Cancer and Leukemia Group B 30307. *J Thorac Oncol Off Publ Int Assoc Study Lung Cancer.* 2010;5(10):1655-1661. doi:10.1097/JTO.0b013e3181ec18db.
475. Gitlitz BJ, Moon J, Glisson BS, et al. Sorafenib in platinum-treated patients with extensive stage small cell lung cancer: a Southwest Oncology Group (SWOG 0435) phase II trial. *J Thorac Oncol Off Publ Int Assoc Study Lung Cancer.* 2010;5(11):1835-1840. doi:10.1097/JTO.0b013e3181f0bd78.
476. Wakelee HA, Lee J-W, Hanna NH, Traynor AM, Carbone DP, Schiller JH. A double-blind randomized discontinuation phase-II study of sorafenib (BAY 43-9006) in previously treated non-small-cell lung cancer patients: eastern cooperative oncology group study E2501. *J Thorac*

*Oncol Off Publ Int Assoc Study Lung Cancer*. 2012;7(10):1574-1582.  
doi:10.1097/JTO.0b013e31826149ba.

477. Safarinejad MR. Safety and efficacy of sorafenib in patients with castrate resistant prostate cancer: a Phase II study. *Urol Oncol*. 2010;28(1):21-27. doi:10.1016/j.urolonc.2008.06.003.
478. Sonpavde G, Periman PO, Bernold D, et al. Sunitinib malate for metastatic castration-resistant prostate cancer following docetaxel-based chemotherapy. *Ann Oncol Off J Eur Soc Med Oncol ESMO*. 2010;21(2):319-324. doi:10.1093/annonc/mdp323.
479. Biagi JJ, Oza AM, Chalchal HI, et al. A phase II study of sunitinib in patients with recurrent epithelial ovarian and primary peritoneal carcinoma: an NCIC Clinical Trials Group Study. *Ann Oncol Off J Eur Soc Med Oncol ESMO*. 2011;22(2):335-340. doi:10.1093/annonc/mdq357.
480. Bellmunt J, González-Larriba JL, Prior C, et al. Phase II study of sunitinib as first-line treatment of urothelial cancer patients ineligible to receive cisplatin-based chemotherapy: baseline interleukin-8 and tumor contrast enhancement as potential predictive factors of activity. *Ann Oncol Off J Eur Soc Med Oncol ESMO*. 2011;22(12):2646-2653. doi:10.1093/annonc/mdr023.
481. Oechsle K, Honecker F, Cheng T, et al. Preclinical and clinical activity of sunitinib in patients with cisplatin-refractory or multiply relapsed germ cell tumors: a Canadian Urologic Oncology Group/German Testicular Cancer Study Group cooperative study. *Ann Oncol Off J Eur Soc Med Oncol ESMO*. 2011;22(12):2654-2660. doi:10.1093/annonc/mdr026.
482. Hui EP, Ma BBY, King AD, et al. Hemorrhagic complications in a phase II study of sunitinib in patients of nasopharyngeal carcinoma who has previously received high-dose radiation. *Ann Oncol Off J Eur Soc Med Oncol ESMO*. 2011;22(6):1280-1287. doi:10.1093/annonc/mdq629.
483. Baumann KH, du Bois A, Meier W, et al. A phase II trial (AGO 2.11) in platinum-resistant ovarian cancer: a randomized multicenter trial with sunitinib (SU11248) to evaluate dosage, schedule, tolerability, toxicity and effectiveness of a multitargeted receptor tyrosine kinase inhibitor monotherapy. *Ann Oncol Off J Eur Soc Med Oncol ESMO*. 2012;23(9):2265-2271. doi:10.1093/annonc/mds003.
484. Chau NG, Hotte SJ, Chen EX, et al. A phase II study of sunitinib in recurrent and/or metastatic adenoid cystic carcinoma (ACC) of the salivary glands: current progress and challenges in evaluating molecularly targeted agents in ACC. *Ann Oncol Off J Eur Soc Med Oncol ESMO*. 2012;23(6):1562-1570. doi:10.1093/annonc/mdr522.
485. Yardley DA, Dees EC, Myers SD, et al. Phase II open-label study of sunitinib in patients with advanced breast cancer. *Breast Cancer Res Treat*. 2012;136(3):759-767. doi:10.1007/s10549-012-2285-0.
486. Fountzilas G, Fragkoulidi A, Kalogera-Fountzila A, et al. A phase II study of sunitinib in patients with recurrent and/or metastatic non-nasopharyngeal head and neck cancer. *Cancer Chemother Pharmacol*. 2010;65(4):649-660. doi:10.1007/s00280-009-1070-1.
487. Carr LL, Mankoff DA, Goulart BH, et al. Phase II study of daily sunitinib in FDG-PET-positive, iodine-refractory differentiated thyroid cancer and metastatic medullary carcinoma of the thyroid with functional imaging correlation. *Clin Cancer Res Off J Am Assoc Cancer Res*. 2010;16(21):5260-5268. doi:10.1158/1078-0432.CCR-10-0994.

488. Faivre S, Zappa M, Vilgrain V, et al. Changes in tumor density in patients with advanced hepatocellular carcinoma treated with sunitinib. *Clin Cancer Res Off J Am Assoc Cancer Res*. 2011;17(13):4504-4512. doi:10.1158/1078-0432.CCR-10-1708.
489. Apostolidou E, Kantarjian H, Thomas D, Burger I, Borthakur G, Verstovsek S. Phase II study of sunitinib in patients with primary or post-polycythemia vera/essential thrombocythemia myelofibrosis. *Clin Lymphoma Myeloma Leuk*. 2010;10(4):281-284. doi:10.3816/CLML.2010.n.058.
490. Moehler M, Mueller A, Hartmann JT, et al. An open-label, multicentre biomarker-oriented AIO phase II trial of sunitinib for patients with chemo-refractory advanced gastric cancer. *Eur J Cancer Oxf Engl 1990*. 2011;47(10):1511-1520. doi:10.1016/j.ejca.2011.04.006.
491. Yi JH, Thongprasert S, Lee J, et al. A phase II study of sunitinib as a second-line treatment in advanced biliary tract carcinoma: a multicentre, multinational study. *Eur J Cancer Oxf Engl 1990*. 2012;48(2):196-201. doi:10.1016/j.ejca.2011.11.017.
492. Mackay HJ, Tinker A, Winqvist E, et al. A phase II study of sunitinib in patients with locally advanced or metastatic cervical carcinoma: NCIC CTG Trial IND.184. *Gynecol Oncol*. 2010;116(2):163-167. doi:10.1016/j.ygyno.2009.08.012.
493. Campos SM, Penson RT, Matulonis U, et al. A phase II trial of Sunitinib malate in recurrent and refractory ovarian, fallopian tube and peritoneal carcinoma. *Gynecol Oncol*. 2013;128(2):215-220. doi:10.1016/j.ygyno.2012.07.126.
494. Mahmood ST, Agresta S, Vigil CE, et al. Phase II study of sunitinib malate, a multitargeted tyrosine kinase inhibitor in patients with relapsed or refractory soft tissue sarcomas. Focus on three prevalent histologies: leiomyosarcoma, liposarcoma and malignant fibrous histiocytoma. *Int J Cancer J Int Cancer*. 2011;129(8):1963-1969. doi:10.1002/ijc.25843.
495. Feldman DR, Turkula S, Ginsberg MS, et al. Phase II trial of sunitinib in patients with relapsed or refractory germ cell tumors. *Invest New Drugs*. 2010;28(4):523-528. doi:10.1007/s10637-009-9280-2.
496. Choong NW, Kozloff M, Taber D, et al. Phase II study of sunitinib malate in head and neck squamous cell carcinoma. *Invest New Drugs*. 2010;28(5):677-683. doi:10.1007/s10637-009-9296-7.
497. Bang Y-J, Kang Y-K, Kang WK, et al. Phase II study of sunitinib as second-line treatment for advanced gastric cancer. *Invest New Drugs*. 2011;29(6):1449-1458. doi:10.1007/s10637-010-9438-y.
498. Molina AM, Feldman DR, Ginsberg MS, et al. Phase II trial of sunitinib in patients with metastatic non-clear cell renal cell carcinoma. *Invest New Drugs*. 2012;30(1):335-340. doi:10.1007/s10637-010-9491-6.
499. Gallagher DJ, Milowsky MI, Gerst SR, et al. Phase II study of sunitinib in patients with metastatic urothelial cancer. *J Clin Oncol Off J Am Soc Clin Oncol*. 2010;28(8):1373-1379. doi:10.1200/JCO.2009.25.3922.
500. Neyns B, Sadones J, Chaskis C, et al. Phase II study of sunitinib malate in patients with recurrent high-grade glioma. *J Neurooncol*. 2011;103(3):491-501. doi:10.1007/s11060-010-0402-7.



501. Laurie SA, Gupta A, Chu Q, et al. Brief report: a phase II study of sunitinib in malignant pleural mesothelioma. the NCIC Clinical Trials Group. *J Thorac Oncol Off Publ Int Assoc Study Lung Cancer*. 2011;6(11):1950-1954. doi:10.1097/JTO.0b013e3182333df5.
502. Schneider BJ, Gadgeel SM, Ramnath N, et al. Phase II trial of sunitinib maintenance therapy after platinum-based chemotherapy in patients with extensive-stage small cell lung cancer. *J Thorac Oncol Off Publ Int Assoc Study Lung Cancer*. 2011;6(6):1117-1120. doi:10.1097/JTO.0b013e31821529c3.
503. Novello S, Camps C, Grossi F, et al. Phase II study of sunitinib in patients with non-small cell lung cancer and irradiated brain metastases. *J Thorac Oncol Off Publ Int Assoc Study Lung Cancer*. 2011;6(7):1260-1266. doi:10.1097/JTO.0b013e318219a973.
504. Buckstein R, Kuruvilla J, Chua N, et al. Sunitinib in relapsed or refractory diffuse large B-cell lymphoma: a clinical and pharmacodynamic phase II multicenter study of the NCIC Clinical Trials Group. *Leuk Lymphoma*. 2011;52(5):833-841. doi:10.3109/10428194.2011.555892.
505. Gervais R, Hainsworth JD, Blais N, et al. Phase II study of sunitinib as maintenance therapy in patients with locally advanced or metastatic non-small cell lung cancer. *Lung Cancer Amst Neth*. 2011;74(3):474-480. doi:10.1016/j.lungcan.2011.05.004.
506. Han J-Y, Kim HY, Lim KY, et al. A phase II study of sunitinib in patients with relapsed or refractory small cell lung cancer. *Lung Cancer Amst Neth*. 2013;79(2):137-142. doi:10.1016/j.lungcan.2012.09.019.
507. Ping G, Hui-Min W, Wei-Min W, Bao-Hui H. Sunitinib in pretreated advanced non-small-cell lung carcinoma: a primary result from Asian population. *Med Oncol Northwood Lond Engl*. 2011;28(2):578-583. doi:10.1007/s12032-010-9500-9.
508. O'Reilly EM, Niedzwiecki D, Hall M, et al. A Cancer and Leukemia Group B phase II study of sunitinib malate in patients with previously treated metastatic pancreatic adenocarcinoma (CALGB 80603). *The oncologist*. 2010;15(12):1310-1319. doi:10.1634/theoncologist.2010-0152.
509. Koeberle D, Montemurro M, Samaras P, et al. Continuous Sunitinib treatment in patients with advanced hepatocellular carcinoma: a Swiss Group for Clinical Cancer Research (SAKK) and Swiss Association for the Study of the Liver (SASL) multicenter phase II trial (SAKK 77/06). *The oncologist*. 2010;15(3):285-292. doi:10.1634/theoncologist.2009-0316.
510. Parikh PM, Vaid A, Advani SH, et al. Randomized, double-blind, placebo-controlled phase II study of single-agent oral talactoferrin in patients with locally advanced or metastatic non-small-cell lung cancer that progressed after chemotherapy. *J Clin Oncol Off J Am Soc Clin Oncol*. 2011;29(31):4129-4136. doi:10.1200/JCO.2010.34.4127.
511. Iwamoto FM, Kreisl TN, Kim L, et al. Phase 2 trial of talampanel, a glutamate receptor inhibitor, for adults with recurrent malignant gliomas. *Cancer*. 2010;116(7):1776-1782. doi:10.1002/cncr.24957.
512. Shepard DR, Cooney MM, Elson P, et al. A phase II study of tandutinib (MLN518), a selective inhibitor of type III tyrosine receptor kinases, in patients with metastatic renal cell carcinoma. *Invest New Drugs*. 2012;30(1):364-367. doi:10.1007/s10637-010-9516-1.

513. Yoshino T, Mizunuma N, Yamazaki K, et al. TAS-102 monotherapy for pretreated metastatic colorectal cancer: a double-blind, randomised, placebo-controlled phase 2 trial. *Lancet Oncol*. 2012;13(10):993-1001. doi:10.1016/S1470-2045(12)70345-5.
514. Kirkwood JM, Gonzalez R, Reintgen D, et al. A phase 2 study of tasisulam sodium (LY573636 sodium) as second-line treatment for patients with unresectable or metastatic melanoma. *Cancer*. 2011;117(20):4732-4739. doi:10.1002/cncr.26068.
515. Scagliotti GV, Ilaria R Jr, Novello S, et al. Tasisulam sodium (LY573636 sodium) as third-line treatment in patients with unresectable, metastatic non-small-cell lung cancer: a phase-II study. *J Thorac Oncol Off Publ Int Assoc Study Lung Cancer*. 2012;7(6):1053-1057. doi:10.1097/JTO.0b013e3182519d79.
516. Pili R, Häggman M, Stadler WM, et al. Phase II randomized, double-blind, placebo-controlled study of tasquinimod in men with minimally symptomatic metastatic castrate-resistant prostate cancer. *J Clin Oncol Off J Am Soc Clin Oncol*. 2011;29(30):4022-4028. doi:10.1200/JCO.2011.35.6295.
517. Medeiros BC, Kohrt HE, Gotlib J, et al. Tailored temozolomide therapy according to MGMT methylation status for elderly patients with acute myeloid leukemia. *Am J Hematol*. 2012;87(1):45-50. doi:10.1002/ajh.22191.
518. Pietanza MC, Kadota K, Huberman K, et al. Phase II trial of temozolomide in patients with relapsed sensitive or refractory small cell lung cancer, with assessment of methylguanine-DNA methyltransferase as a potential biomarker. *Clin Cancer Res Off J Am Assoc Cancer Res*. 2012;18(4):1138-1145. doi:10.1158/1078-0432.CCR-11-2059.
519. Perry JR, Bélanger K, Mason WP, et al. Phase II trial of continuous dose-intense temozolomide in recurrent malignant glioma: RESCUE study. *J Clin Oncol Off J Am Soc Clin Oncol*. 2010;28(12):2051-2057. doi:10.1200/JCO.2009.26.5520.
520. Gállego Pérez-Larraya J, Ducray F, Chinot O, et al. Temozolomide in elderly patients with newly diagnosed glioblastoma and poor performance status: an ANOCEF phase II trial. *J Clin Oncol Off J Am Soc Clin Oncol*. 2011;29(22):3050-3055. doi:10.1200/JCO.2011.34.8086.
521. Berrocal A, Perez Segura P, Gil M, et al. Extended-schedule dose-dense temozolomide in refractory gliomas. *J Neurooncol*. 2010;96(3):417-422. doi:10.1007/s11060-009-9980-7.
522. Abacioglu U, Caglar HB, Yumuk PF, Akgun Z, Atasoy BM, Sengoz M. Efficacy of protracted dose-dense temozolomide in patients with recurrent high-grade glioma. *J Neurooncol*. 2011;103(3):585-593. doi:10.1007/s11060-010-0423-2.
523. Kong D-S, Lee J-I, Kim JH, et al. Phase II trial of low-dose continuous (metronomic) treatment of temozolomide for recurrent glioblastoma. *Neuro-Oncol*. 2010;12(3):289-296. doi:10.1093/neuonc/nop030.
524. Gan HK, Rosenthal MA, Dowling A, et al. A phase II trial of primary temozolomide in patients with grade III oligodendroglial brain tumors. *Neuro-Oncol*. 2010;12(5):500-507. doi:10.1093/neuonc/nop065.
525. Maroto P, Huddart R, Garcia del Muro X, et al. Brief report: phase II multicenter study of temozolomide in patients with cisplatin-resistant germ cell tumors. *Oncology*. 2011;80(3-4):219-222. doi:10.1159/000329041.

526. Javle MM, Shroff RT, Xiong H, et al. Inhibition of the mammalian target of rapamycin (mTOR) in advanced pancreatic cancer: results of two phase II studies. *BMC Cancer*. 2010;10:368. doi:10.1186/1471-2407-10-368.
527. Fleming GF, Ma CX, Huo D, et al. Phase II trial of temsirolimus in patients with metastatic breast cancer. *Breast Cancer Res Treat*. 2012;136(2):355-363. doi:10.1007/s10549-011-1910-7.
528. Okuno S, Bailey H, Mahoney MR, et al. A phase 2 study of temsirolimus (CCI-779) in patients with soft tissue sarcomas: a study of the Mayo phase 2 consortium (P2C). *Cancer*. 2011;117(15):3468-3475. doi:10.1002/cncr.25928.
529. Behbakht K, Sill MW, Darcy KM, et al. Phase II trial of the mTOR inhibitor, temsirolimus and evaluation of circulating tumor cells and tumor biomarkers in persistent and recurrent epithelial ovarian and primary peritoneal malignancies: a Gynecologic Oncology Group study. *Gynecol Oncol*. 2011;123(1):19-26. doi:10.1016/j.ygyno.2011.06.022.
530. Smith SM, van Besien K, Karrison T, et al. Temsirolimus has activity in non-mantle cell non-Hodgkin's lymphoma subtypes: The University of Chicago phase II consortium. *J Clin Oncol Off J Am Soc Clin Oncol*. 2010;28(31):4740-4746. doi:10.1200/JCO.2010.29.2813.
531. Reungwetwattana T, Molina JR, Mandrekar SJ, et al. Brief report: a phase II "window-of-opportunity" frontline study of the MTOR inhibitor, temsirolimus given as a single agent in patients with advanced NSCLC, an NCCTG study. *J Thorac Oncol Off Publ Int Assoc Study Lung Cancer*. 2012;7(5):919-922. doi:10.1097/JTO.0b013e31824de0d6.
532. Gerullis H, Eimer C, Ecke TH, et al. A phase II trial of temsirolimus in second-line metastatic urothelial cancer. *Med Oncol Northwood Lond Engl*. 2012;29(4):2870-2876. doi:10.1007/s12032-012-0216-x.
533. Witzig TE, Tang H, Micallef INM, et al. Multi-institutional phase 2 study of the farnesyltransferase inhibitor tipifarnib (R115777) in patients with relapsed and refractory lymphomas. *Blood*. 2011;118(18):4882-4889. doi:10.1182/blood-2011-02-334904.
534. Rolland D, Ribrag V, Haioun C, et al. Phase II trial and prediction of response of single agent tipifarnib in patients with relapsed/refractory mantle cell lymphoma: a Groupe d'Etude des Lymphomes de l'Adulte trial. *Cancer Chemother Pharmacol*. 2010;65(4):781-790. doi:10.1007/s00280-009-1185-4.
535. Gajewski TF, Salama AKS, Niedzwiecki D, et al. Phase II study of the farnesyltransferase inhibitor R115777 in advanced melanoma (CALGB 500104). *J Transl Med*. 2012;10:246. doi:10.1186/1479-5876-10-246.
536. Mason WP, Belanger K, Nicholas G, et al. A phase II study of the Ras-MAPK signaling pathway inhibitor TLN-4601 in patients with glioblastoma at first progression. *J Neurooncol*. 2012;107(2):343-349. doi:10.1007/s11060-011-0747-6.
537. Spigel DR, Greco FA, Burris HA 3rd, et al. A phase II study of higher dose weekly topotecan in relapsed small-cell lung cancer. *Clin Lung Cancer*. 2011;12(3):187-191. doi:10.1016/j.clcc.2011.03.016.
538. Gonzalez EE, Villanueva N, Fra J, et al. Activity of topotecan given intravenously for 5 days every three weeks in patients with advanced non-small cell lung cancer pretreated with platinum

and taxanes: a phase II study. *Invest New Drugs*. 2011;29(6):1459-1464. doi:10.1007/s10637-010-9442-2.

539. Aoki D, Katsumata N, Nakanishi T, et al. A phase II clinical trial of topotecan in Japanese patients with relapsed ovarian carcinoma. *Jpn J Clin Oncol*. 2011;41(3):320-327. doi:10.1093/jjco/hyq192.
540. Puls LE, Phillips B, Schammel C, Hunter JE, Griffin D. A phase I-II trial of weekly topotecan in the treatment of recurrent cervical carcinoma. *Med Oncol Northwood Lond Engl*. 2010;27(2):368-372. doi:10.1007/s12032-009-9219-7.
541. Lorusso D, Mainenti S, Pietragalla A, et al. Phase II study on weekly bolus topotecan in advanced or recurrent cervical cancer. *Oncology*. 2011;80(5-6):390-394. doi:10.1159/000330537.
542. Löwenberg B, Morgan G, Ossenkoppele GJ, et al. Phase I/II clinical study of Tosedostat, an inhibitor of aminopeptidases, in patients with acute myeloid leukemia and myelodysplasia. *J Clin Oncol Off J Am Soc Clin Oncol*. 2010;28(28):4333-4338. doi:10.1200/JCO.2009.27.6295.
543. Fayette J, Boyle H, Chabaud S, et al. Efficacy of trabectedin for advanced sarcomas in clinical trials versus compassionate use programs: analysis of 92 patients treated in a single institution. *Anticancer Drugs*. 2010;21(1):113-119. doi:10.1097/CAD.0b013e328333057b.
544. Monk BJ, Blessing JA, Street DG, Muller CY, Burke JJ, Hensley ML. A phase II evaluation of trabectedin in the treatment of advanced, persistent, or recurrent uterine leiomyosarcoma: a gynecologic oncology group study. *Gynecol Oncol*. 2012;124(1):48-52. doi:10.1016/j.ygyno.2011.09.019.
545. Ralph C, Elkord E, Burt DJ, et al. Modulation of lymphocyte regulation for cancer therapy: a phase II trial of tremelimumab in advanced gastric and esophageal adenocarcinoma. *Clin Cancer Res Off J Am Assoc Cancer Res*. 2010;16(5):1662-1672. doi:10.1158/1078-0432.CCR-09-2870.
546. Kirkwood JM, Lorigan P, Hersey P, et al. Phase II trial of tremelimumab (CP-675,206) in patients with advanced refractory or relapsed melanoma. *Clin Cancer Res Off J Am Assoc Cancer Res*. 2010;16(3):1042-1048. doi:10.1158/1078-0432.CCR-09-2033.
547. Li T, Christensen SD, Frankel PH, et al. A phase II study of cell cycle inhibitor UCN-01 in patients with metastatic melanoma: a California Cancer Consortium trial. *Invest New Drugs*. 2012;30(2):741-748. doi:10.1007/s10637-010-9562-8.
548. Mohammed TA, Holen KD, Jaskula-Sztul R, et al. A pilot phase II study of valproic acid for treatment of low-grade neuroendocrine carcinoma. *The oncologist*. 2011;16(6):835-843. doi:10.1634/theoncologist.2011-0031.
549. Leboulleux S, Bastholt L, Krause T, et al. Vandetanib in locally advanced or metastatic differentiated thyroid cancer: a randomised, double-blind, phase 2 trial. *Lancet Oncol*. 2012;13(9):897-905. doi:10.1016/S1470-2045(12)70335-2.
550. Gauler TC, Besse B, Mauguen A, et al. Phase II trial of PTK787/ZK 222584 (vatalanib) administered orally once-daily or in two divided daily doses as second-line monotherapy in relapsed or progressing patients with stage IIIB/IV non-small-cell lung cancer (NSCLC). *Ann Oncol Off J Eur Soc Med Oncol ESMO*. 2012;23(3):678-687. doi:10.1093/annonc/mdr255.

551. Joensuu H, De Braud F, Grignani G, et al. Vatalanib for metastatic gastrointestinal stromal tumour (GIST) resistant to imatinib: final results of a phase II study. *Br J Cancer*. 2011;104(11):1686-1690. doi:10.1038/bjc.2011.151.
552. Cook N, Basu B, Biswas S, et al. A phase 2 study of vatalanib in metastatic melanoma patients. *Eur J Cancer Oxf Engl 1990*. 2010;46(15):2671-2673. doi:10.1016/j.ejca.2010.07.014.
553. Jahan T, Gu L, Kratzke R, et al. Vatalanib in malignant mesothelioma: a phase II trial by the Cancer and Leukemia Group B (CALGB 30107). *Lung Cancer Amst Neth*. 2012;76(3):393-396. doi:10.1016/j.lungcan.2011.11.014.
554. Blasinska-Morawiec M, Tubiana-Mathieu N, Fougeray R, Pinel M-C, Bognoux P. Phase II study of intravenous vinflunine after failure of first-line vinorelbine based regimen for advanced breast cancer. *Breast Edinb Scotl*. 2013;22(1):58-63. doi:10.1016/j.breast.2012.10.007.
555. Hainsworth JD, Meluch AA, Lane CM, et al. Single agent vinflunine in the salvage treatment of patients with castration-resistant prostate cancer: a phase II trial of the Sarah Cannon research consortium. *Cancer Invest*. 2010;28(3):275-279. doi:10.3109/07357900902918460.
556. Yardley DA, McCleod M, Schreiber F, et al. A phase II trial of vinflunine as monotherapy or in combination with trastuzumab as first-line treatment of metastatic breast cancer. *Cancer Invest*. 2010;28(9):925-931. doi:10.3109/07357907.2010.496755.
557. Spigel DR, Hainsworth JD, Lane CM, Clark B, Burris HA, Greco FA. Phase II trial of vinflunine in relapsed small cell lung cancer. *J Thorac Oncol Off Publ Int Assoc Study Lung Cancer*. 2010;5(6):874-878.
558. Camerini A, Valsuani C, Mazzoni F, et al. Phase II trial of single-agent oral vinorelbine in elderly (> or =70 years) patients with advanced non-small-cell lung cancer and poor performance status. *Ann Oncol Off J Eur Soc Med Oncol ESMO*. 2010;21(6):1290-1295. doi:10.1093/annonc/mdp525.
559. Addeo R, Sgambato A, Cennamo G, et al. Low-dose metronomic oral administration of vinorelbine in the first-line treatment of elderly patients with metastatic breast cancer. *Clin Breast Cancer*. 2010;10(4):301-306. doi:10.3816/CBC.2010.n.039.
560. Seo HY, Lee HJ, Woo OH, et al. Phase II study of vinorelbine monotherapy in anthracycline and taxane pre-treated metastatic breast cancer. *Invest New Drugs*. 2011;29(2):360-365. doi:10.1007/s10637-009-9357-y.
561. Bell-McGuinn KM, Matthews CM, Ho SN, et al. A phase II, single-arm study of the anti- $\alpha 5\beta 1$  integrin antibody volociximab as monotherapy in patients with platinum-resistant advanced epithelial ovarian or primary peritoneal cancer. *Gynecol Oncol*. 2011;121(2):273-279. doi:10.1016/j.ygyno.2010.12.362.
562. Krug LM, Crawford J, Ettinger DS, et al. Phase II multicenter trial of voreloxin as second-line therapy in chemotherapy-sensitive or refractory small cell lung cancer. *J Thorac Oncol Off Publ Int Assoc Study Lung Cancer*. 2011;6(2):384-386. doi:10.1097/JTO.0b013e318200e509.
563. Kirschbaum M, Frankel P, Popplewell L, et al. Phase II Study of Vorinostat for Treatment of Relapsed or Refractory Indolent Non-Hodgkin's Lymphoma and Mantle Cell Lymphoma. *J Clin Oncol*. 2011;JCO.2010.32.1398. doi:10.1200/JCO.2010.32.1398.

564. Kirschbaum MH, Goldman BH, Zain JM, et al. A phase 2 study of vorinostat for treatment of relapsed or refractory Hodgkin lymphoma: Southwest Oncology Group Study S0517. *Leuk Lymphoma*. 2012;53(2):259-262. doi:10.3109/10428194.2011.608448.
565. Wong N-S, Seah EZ, Wang L-Z, et al. Impact of UDP-gluconoryltransferase 2B17 genotype on vorinostat metabolism and clinical outcomes in Asian women with breast cancer. *Pharmacogenet Genomics*. 2011;21(11):760-768. doi:10.1097/FPC.0b013e32834a8639.
566. Pietanza MC, Lynch TJ Jr, Lara PN Jr, et al. XL647--a multitargeted tyrosine kinase inhibitor: results of a phase II study in subjects with non-small cell lung cancer who have progressed after responding to treatment with either gefitinib or erlotinib. *J Thorac Oncol Off Publ Int Assoc Study Lung Cancer*. 2012;7(1):219-226. doi:10.1097/JTO.0b013e31822eebf9.
567. Tolcher AW, Quinn DI, Ferrari A, et al. A phase II study of YM155, a novel small-molecule suppressor of survivin, in castration-resistant taxane-pretreated prostate cancer. *Ann Oncol Off J Eur Soc Med Oncol ESMO*. 2012;23(4):968-973. doi:10.1093/annonc/mdr353.
568. Cheson BD, Bartlett NL, Vose JM, et al. A phase II study of the survivin suppressant YM155 in patients with refractory diffuse large B-cell lymphoma. *Cancer*. 2012;118(12):3128-3134. doi:10.1002/cncr.26510.
569. Lewis KD, Samlowski W, Ward J, et al. A multi-center phase II evaluation of the small molecule survivin suppressor YM155 in patients with unresectable stage III or IV melanoma. *Invest New Drugs*. 2011;29(1):161-166. doi:10.1007/s10637-009-9333-6.
570. James ND, Caty A, Payne H, et al. Final safety and efficacy analysis of the specific endothelin A receptor antagonist zibotentan (ZD4054) in patients with metastatic castration-resistant prostate cancer and bone metastases who were pain-free or mildly symptomatic for pain: a double-blind, placebo-controlled, randomized Phase II trial. *BJU Int*. 2010;106(7):966-973. doi:10.1111/j.1464-410X.2010.09638.x.
